# Supplementary material for: The Enterprise , a massive transposon carrying Spok meiotic drive genes
Source: HighWire-hosted journal article supplement (doi:10.1101/gr.267609.120), 2021-04-19
Supplement: Supplemental_Table_S1_Assembly_stats.xlsx [file Supplemental_Table_S1_Assembly_stats.xlsx]

## Sheet: Assemblies
Supplementary Table S1 Assembly statistics for all strains with genomic data used in this study.
Species	Strain	Assembly	Technology	Assembler	Scaffoldsa	N50	GC content	Size (bp)	Mean Depth long (x)	Mean Depth short (x)	No. Readsb	Mean Read Length (bp)	Repeat Content (%)c	Source
P. anserina	Wa21-	PaWa21m	PacBio	HGAP 3.0	9	5072363	51.49	35767411	80.3071	78.0394	313285	11863	5.893	Vogan et al. 2019
P. anserina	Wa28-	PaWa28m	PacBio	HGAP 3.0	7	5076631	51.41	35929333	76.2045	81.0651	327199	10105	5.961	Vogan et al. 2019
P. anserina	Wa46+	PaWa46p	PacBio	HGAP 3.0	9	4338573	51.37	35724019	117.829	107.469	363721	12949	6.042	Vogan et al. 2019
P. anserina	Wa53-	PaWa53m	PacBio	HGAP 3.0	7	4924837	51.52	35808992	83.821	78.7383	327523	11382	5.924	Vogan et al. 2019
P. anserina	Wa58-	PaWa58m	PacBio	HGAP 3.0	7	5037662	51.46	35985748	112.171	88.3996	354055	13130	6.109	Vogan et al. 2019
P. anserina	Wa63+	PaWa63p	PacBio	HGAP 3.0	7	4907271	51.36	36002190	111.225	77.4007	351077	12562	6.223	Vogan et al. 2019
P. anserina	Wa87+	PaWa87p	PacBio	HGAP 3.0	9	4338609	51.44	35896992	105.879	74.3914	356924	12928	6.171	Vogan et al. 2019
P. anserina	Wa100+	PaWa100p	PacBio	HGAP 3.0	7	5096663	51.5	35953417	114.091	80.9098	361645	12857	5.914	Vogan et al. 2019
P. anserina	Wa137-	PaWa137m	MinION	Miniasm 0.2	9	4341106	51.08	36531367	49.924	143.692	330780	7913.12	6.047	This study
P. anserina	Y+	PaYp	MinION	Miniasm 0.2	8	4821330	51.55	35719817	35.6112	83.7234	697535	1951.88	5.873	Vogan et al. 2019
P. anserina	TG+	PaTgp	MinION	Miniasm 0.2	13	4230402	51.54	35778794	37.6743	155.934	1286164	1383.79	6.009	Vogan et al. 2019
P. pauciseta	CBS237.71-	CBS237.71m	MinION	Miniasm 0.2	13	4070182	51.6	35576233	24.3067	105.704	240014	6188.33	6.056	Vogan et al. 2019
P. comata	Wa131-	PcWa131m	Illumina HiSeq	SPAdes 3.12.0	1119	258199	52.1	34680523	-	162.022	39127244	150	3.555	This study
P. comata	Wa139-	PcWa139m	MinION	Miniasm 0.2	7	4603841	51.98	34819024	52.5779	150.935	236001	5786	3.769	This study
P. anserina	S+	Podan2	WGS	Arachne	7	4734292	52.17	35010595	-	10	-	-	4.629	Espagne et al. 2008
P. comata	TD+	PODCO	454 + Illumina	Newbler 2.3	7	4662433	52.42	34385490	-	22	-	-	3.054	Silar et al. 2018
aThe number of scaffolds correspond to those that map to the 7 chromosomes (excluding mitochondrial and rDNA contigs), but other columns include all scaffolds
bNumbers correspond to long-read data when available, otherwise to short-read data. For Wa139- and Wa137- the reads were filteread for QV>9 and to be larger than 1kb, resulting in 184301 and 202279 reads, respectively.
cScaffolds larger than 50kb, excluding the mitochondrial and rDNA scaffolds
