# Supplementary material for: The Enterprise , a massive transposon carrying Spok meiotic drive genes
Source: HighWire-hosted journal article supplement (doi:10.1101/gr.267609.120), 2021-04-19
Supplement: Supplemental_Table_S2_gene_functions.xlsx [file Supplemental_Table_S2_gene_functions.xlsx]

## Sheet: Sheet1
Supplementary Table S2 Hypothetical genes from within the Spok block of Wa137. Gene notation follows the supplied GFF file in the GitHub repository (https://github.com/johannessonlab/SpokBlockPaper). Pfam domains inferred from NCBI conserved domain database. Putative functions inferred from BLASTP to other genes with functional annotations. Blank cells indicate either no Pfam hits, or genes with …
Gene code|name in Wa137	pfam				Putative function
Psk-9.00003|Kirc	DUF3435 superfamily	CD_CSD superfamily	CHROMO
Psk-9.00004|Uhera1	DEAD-like_helicase_C superfamily	DEAD-like_helicase_N superfamily
Psk-9.00009|PpBr36_10652_Pyricularia_pennisetigena	Peptidase_C48 superfamily
Psk-9.00019|Pa_2_5490_homolog	NAP
Psk-9.00022|S7711_11618_Stachybotrys_chartarum_homolog					NAD-dependent protein deacetylase
Psk-9.00025|Pa_7_10380_fragment
Psk-9.00029|CH35J_006576_Colletotrichum_higginsianum_fragment	Patatin_and_cPLA2 superfamily				Phospholipase A2
Psk-9.00031|PODCO_502086_Fragment	DDE_Tnp_ISL3 superfamily				PKS-NRPS hybrid synthetase
Psk-9.00034|Pa_4_1058_homolog
Psk-9.00038|Spok4					Spore killer
Psk-9.00041|Pa_5_2010_fragment1					GPI anchored serine-threonine rich protein
Psk-9.00043|Uhera2
Psk-9.00044|Pa_1_14730_fragment					EST/SMG-like protein 1
Psk-9.00046|Pa_6_9560_Fragment	p450 superfamily				pisatin demethylase
Psk-9.00051|Pa_6_9560_homolog	p450 superfamily				pisatin demethylase
Psk-9.00053|Pa_7_6640_Fragment	Peptidase_M16_M superfamily				insulysin
Psk-9.00054|CTA1_5148_Colletotrichum_tanaceti_fragment	NK superfamily				Uridylate kinase
Psk-9.00055|Pa_6_9580_homolog					Satratoxin biosynthesis SC1 cluster protein 4
Psk-9.00057|Pa_4_3510_homolog;	Peptidase_C48 superfamily	GumC superfamily
Psk-9.00060|Pa_1_13070_fragment	zf-H2C2_2	zf-C2H2	COG5048		cutinase G-box binding protein
Psk-9.00063|PODCO_102140_fragment	ABC_ATPase superfamily				Heavy metal tolerance protein
Psk-9.00065|PV05_03319_Exophiala_xenobiotica_fragment	MdlB				Heavy metal tolerance protein
Psk-9.00067|Pa_6_7965_homolog
Psk-9.00070|Pa_1_13070_homolog	zf-C2H2	zf-H2C2_2	zf-C2H2	lambda-1 superfamily	cutinase G-box binding protein
Psk-9.00073|Pa_6_2490_fragment1
Psk-9.00075|PODCO_511675_homolog
Psk-9.00077|Chekof_fragment;Pa_6_2440_homolog	PRK09605 superfamily
Psk-9.00078|MBR_09427_Metarhizium_brunneum_fragment					mitofusin
Psk-9.00081|PODCO_511675_homolog_2
Psk-9.00082|Pa_1_14730_fragment					EST/SMG-like protein 1
Psk-9.00086|S40285_10826_Stachybotrys_chlorohalonata_homolog
Psk-9.00088|Micbo1qcDRAFT_170078_Microdochium_bolleyi_homolog
Psk-9.00091|Pa_5_2010_homolog					GPI anchored serine-threonine rich protein
Psk-9.00095|Pa_6_8910_homolog	AdoMet_MTases superfamily				Trans-aconitate 2-methyltransferase
Psk-9.00098|CHGG_04275_Chaetomium_globosum
Psk-9.00102|DL98DRAFT_554023_Cadophora_sp_homolog
Psk-9.00103|MBR_09427_Metarhizium_brunneum_homolog					mitofusin
Psk-9.00105|Pa_4_1930_fragment	Isoprenoid_Biosyn_C1 superfamily				Iridoid synthase
Psk-9.00106|CHGG_09441_Chaetomium_globosum_homolog
Psk-9.00109|NA56DRAFT_749014_Pezoloma_ericae_fragment
Psk-9.00112|PV05_03319_Exophiala_xenobiotica_fragment	ABC_ATPase superfamily				ABC transporter
Psk-9.00114|SPI_07993_homolog_Metallophosphoesterase	MPP_Dcr2				Metallo-dependent phosphatase
Psk-9.00115|K432DRAFT_223816_Lepidopterella_palustris_homolog	TPR_12
Psk-9.00117|Pa_1_1830_homolog	GT2_HAS				Hyaluronan synthase
Psk-9.00118|Pa_1_14730_homolog	EST1_DNA_bind superfamily				EST/SMG-like protein 1
Psk-9.00122|S7711_10142_Stachybotrys_chartarum_homolog	CD_CSD superfamily
Psk-9.00123|HIM_12183_Hirsutella_minnesotensis_homolog	Pkinase superfamily
Psk-9.00124|M441DRAFT_90628_Trichoderma_asperellum_homolog
Psk-9.00125|S7711_11475_Stachybotrys_chartarum_homolog
Psk-9.00126|S40293_11413_Stachybotrys_chartarum					patatin-like serine hydrolase
Psk-9.00130|NA56DRAFT_703776_Pezoloma_ericae_homolog	DUF3723 superfamily	PTZ00121 superfamily
Psk-9.00137|Micbo1qcDRAFT_129033_Microdochium_bolleyi_homolog					Satratoxin biosynthesis SC1 cluster protein 4
Psk-9.00138|Pa_5_3190_homolog	MFS superfamily				Efflux pump FUS6
Psk-9.00142|Pa_7_6640_homolog	Ptr superfamily				insulysin
Psk-9.00145|Scoty;SS1G_08066_Sclerotinia_sclerotiorum_homolog
Psk-9.00146|Chekof;Pa_6_2440_homolog	PKc_like superfamily
Psk-9.00147|Pa_1_1830_fragment	Peptidase_C48 superfamily
Psk-9.00150|PpBr36_10652_Pyricularia_pennisetigena_homolog
Psk-9.00151|Pa_4_3510_fragment
Psk-9.00155|GE09DRAFT_1263105_Coniochaeta_sp_homolog	MdlB				Heavy metal tolerance protein
Psk-9.00157|CHGG_09572_Chaetomium_globosum_fragment					Putative AC transposase
Psk-9.00159|MBR_09427_Metarhizium_brunneum_homolog
Psk-9.00160|AJ78_06594_Emergomyces_pasteurianus_homolog
Psk-9.00163|Pa_5_3190_homolog	MFS superfamily				Efflux pump FUS6
Psk-9.00164|CSUB01_08519_Colletotrichum_sublineola_homolog;	CFEM superfamily				Satratoxin biosynthesis SC1 cluster protein 4
Psk-9.00168|MYCTH_64320_Thermothelomyces_thermophilus_homolog
Psk-9.00174|DL765_007700_Monosporascus_sp_fragment

## Sheet: Thesis
Gene code|name in Wa137	pfam	Putative function
gene01805|Kirc	DUF3435 superfamily; CD_CSD superfamily; CHROMO
gene01806|Uhera1	DEAD-like_helicase_C superfamily; DEAD-like_helicase_N superfamily
PaWa137m.02400|PpBr36_10652_Pyricularia_pennisetigena	Peptidase_C48 superfamily
PaWa137m.02401|Pa_2_5490_homolog	NAP
PaWa137m.02402|S7711_11618_Stachybotrys_chartarum_homolog		NAD-dependent protein deacetylase
PaWa137m_chromosome_1.2:hsp:120951:4.5.0.58|Pa_7_10380_fragment
PaWa137m_CH35J_006576|CH35J_006576_Colletotrichum_higginsianum_fragment	Patatin_and_cPLA2 superfamily	Phospholipase A2
PaWa137m.02404|PODCO_502086_Fragment	DDE_Tnp_ISL3 superfamily	PKS-NRPS hybrid synthetase
PaWa137m.02405|Pa_4_1058_homolog
gene00315|Spok4		Spore killer
PaWa137m.Pa_5_2010_fragment1|Pa_5_2010_fragment1		GPI anchored serine-threonine rich protein
gene01852|Uhera2
PaWa137m_Pa_1_14730_fragment1|Pa_1_14730_fragment		EST/SMG-like protein 1
gene01815|Pa_6_9560_Fragment	p450 superfamily	pisatin demethylase
gene01816|Pa_6_9560_homolog	p450 superfamily	pisatin demethylase
PaWa137m_7_6640_fragment|Pa_7_6640_Fragment	Peptidase_M16_M superfamily	insulysin
PaWa137m_CTA1_5148_Colletotrichum_tanaceti_fragment	NK superfamily	Uridylate kinase
PaWa137m.gene.002245|Pa_6_9580_homolog		Satratoxin biosynthesis SC1 cluster protein 4
gene01818|Pa_4_3510_homolog	Peptidase_C48 superfamily; GumC superfamily
PaWa137m.gene.002249|Pa_1_13070_fragment	zf-H2C2_2; zf-C2H2; COG5048	cutinase G-box binding protein
PaWa137m.gene.PODCO_102140|PODCO_102140_fragment	ABC_ATPase superfamily	Heavy metal tolerance protein
gene01820|PV05_03319_Exophiala_xenobiotica_fragment	MdlB	Heavy metal tolerance protein
PaWa137m.02410|Pa_6_7965_homolog
gene01823|Pa_1_13070_homolog	zf-C2H2; zf-H2C2_2; zf-C2H2; lambda-1 superfamily	cutinase G-box binding protein
PaWa137m_Pa_6_2490_fragment|Pa_6_2490_fragment
gene01824|PODCO_511675_homolog
PaWa137m_Pa_6_2440_fragment|Pa_6_2440_fragment	PRK09605 superfamily
PaWa137m_MBR_09427_Metarhizium_brunneum_fragment		mitofusin
gene01824.2|PODCO_511675_homolog_2
PaWa137m_Pa_1_14730_fragment		EST/SMG-like protein 1
PaWa137m.02414|S40285_10826_Stachybotrys_chlorohalonata_homolog
PaWa137m.02415|Micbo1qcDRAFT_170078_Microdochium_bolleyi_homolog
PaWa137m.02416|Pa_5_2010_homolog		GPI anchored serine-threonine rich protein
PaWa137m.gene.002259|Pa_6_8910_homolog	AdoMet_MTases superfamily	Trans-aconitate 2-methyltransferase
gene01828|CHGG_04275_Chaetomium_globosum
gene01830|DL98DRAFT_554023_Cadophora_sp_homolog
gene01831|MBR_09427_Metarhizium_brunneum_homolog		mitofusin
WaPa137m_4_1930|Pa_4_1930_fragment	Isoprenoid_Biosyn_C1 superfamily	Iridoid synthase
PaWa137m.gene.002264|CHGG_09441_Chaetomium_globosum_homolog
PaWa137m_NA56DRAFT_749014_Pezoloma_ericae_fragment
PaWa137m.gene.002265|PV05_03319_Exophiala_xenobiotica_fragment	ABC_ATPase superfamily	ABC transporter
gene01834|SPI_07993_homolog_ Metallophosphoesterase	MPP_Dcr2	Metallo-dependent phosphatase
PaWa137m_K432DRAFT_223816_Lepidopterella_palustris_homolog	TPR_12
gene01835|Pa_1_1830_homolog	GT2_HAS	Hyaluronan synthase
gene01836|Pa_1_14730_homolog	EST1_DNA_bind superfamily	EST/SMG-like protein 1
PaWa137m.02425|S7711_10142_Stachybotrys_chartarum_homolog	CD_CSD superfamily
PaWa137m_HIM_12183|HIM_12183_Hirsutella_minnesotensis_homolog	Pkinase superfamily
PaWa137m_M441DRAFT_90628|M441DRAFT_90628_Trichoderma_asperellum_homolog
gene01838|S7711_11475_Stachybotrys_chartarum_homolog
gene01839|S40293_11413_Stachybotrys_chartarum		patatin-like serine hydrolase
gene01840|NA56DRAFT_703776_Pezoloma_ericae_homolog	DUF3723 superfamily;PTZ00121 superfamily
gene01841|Micbo1qcDRAFT_129033_Microdochium_bolleyi_homolog		Satratoxin biosynthesis SC1 cluster protein 4
gene01842|Pa_5_3190_homolog	MFS superfamily	Efflux pump FUS6
gene01843|Pa_7_6640_homolog	Ptr superfamily	insulysin
PaWa137m_SS1G_08066_Sclerotinia_sclerotiorum_homolog|Scoty
gene01844|Chekof	PKc_like superfamily
PaWa137m_Pa_1_1830_fragment	Peptidase_C48 superfamily
PaWa137m.gene.002278|PpBr36_10652_Pyricularia_pennisetigena_homolog
gene01845|Pa_4_3510_fragment
gene01847|GE09DRAFT_1263105_Coniochaeta_sp_homolog	MdlB	Heavy metal tolerance protein
gene01849|CHGG_09572_Chaetomium_globosum_fragment		Putative AC transposase
gene01850|MBR_09427_Metarhizium_brunneum_homolog
PaWa137m_AJ78_06594_Emergomyces_pasteurianus_homolog
PaWa137m.02432|Pa_5_3190_homolog	MFS superfamily	Efflux pump FUS6
PaWa137m_CSUB01_08519_Colletotrichum_sublineola_homolog	CFEM superfamily	Satratoxin biosynthesis SC1 cluster protein 4
PaWa137m.gene.002286|MYCTH_64320_Thermothelomyces_thermophilus_homolog
PaWa137m_DL765_007700_Monosporascus_sp_fragment

## Sheet: Sheet2
Psk-9.00003|Kirc;Note=Pa_5_10116_homolog
Psk-9.00004|Uhera1
Psk-9.00009|PpBr36_10652_Pyricularia_pennisetigena
Psk-9.00019|Pa_2_5490_homolog
Psk-9.00022|S7711_11618_Stachybotrys_chartarum_homolog
Psk-9.00025|Pa_7_10380_fragment
Psk-9.00029|CH35J_006576_Colletotrichum_higginsianum_fragment
Psk-9.00031|PODCO_502086_Fragment
Psk-9.00034|Pa_4_1058_homolog
Psk-9.00038|Spok4;Note=Pa_5_10_homolog
Psk-9.00040|Unknown1
Psk-9.00041|Pa_5_2010_fragment1
Psk-9.00043|Uhera2
Psk-9.00044|Pa_1_14730_fragment
Psk-9.00046|Pa_6_9560_Fragment
Psk-9.00051|Pa_6_9560_homolog
Psk-9.00053|Pa_7_6640_Fragment
Psk-9.00054|CTA1_5148_Colletotrichum_tanaceti_fragment
Psk-9.00055|Pa_6_9580_homolog
Psk-9.00057|Pa_4_3510_homolog;
Psk-9.00060|Pa_1_13070_fragment
Psk-9.00063|PODCO_102140_fragment
Psk-9.00065|PV05_03319_Exophiala_xenobiotica_fragment
Psk-9.00067|Pa_6_7965_homolog
Psk-9.00070|Pa_1_13070_homolog
Psk-9.00073|Pa_6_2490_fragment1
Psk-9.00075|PODCO_511675_homolog
Psk-9.00077|Pa_6_2440_fragment
Psk-9.00078|MBR_09427_Metarhizium_brunneum_fragment
Psk-9.00081|PODCO_511675_homolog_2
Psk-9.00082|Pa_1_14730_fragment
Psk-9.00086|S40285_10826_Stachybotrys_chlorohalonata_homolog
Psk-9.00088|Micbo1qcDRAFT_170078_Microdochium_bolleyi_homolog
Psk-9.00091|Pa_5_2010_homolog
Psk-9.00095|Pa_6_8910_homolog
Psk-9.00098|CHGG_04275_Chaetomium_globosum
Psk-9.00102|DL98DRAFT_554023_Cadophora_sp_homolog
Psk-9.00103|MBR_09427_Metarhizium_brunneum_homolog
Psk-9.00105|Pa_4_1930_fragment
Psk-9.00106|CHGG_09441_Chaetomium_globosum_homolog
Psk-9.00109|NA56DRAFT_749014_Pezoloma_ericae_fragment
Psk-9.00112|PV05_03319_Exophiala_xenobiotica_fragment
Psk-9.00114|SPI_07993_homolog_ Metallophosphoesterase
Psk-9.00115|K432DRAFT_223816_Lepidopterella_palustris_homolog
Psk-9.00117|Pa_1_1830_homolog
Psk-9.00118|Pa_1_14730_homolog
Psk-9.00120|Pa_6_2490_fragment2
Psk-9.00122|S7711_10142_Stachybotrys_chartarum_homolog
Psk-9.00123|HIM_12183_Hirsutella_minnesotensis_homolog
Psk-9.00124|M441DRAFT_90628_Trichoderma_asperellum_homolog
Psk-9.00125|S7711_11475_Stachybotrys_chartarum_homolog
Psk-9.00126|S40293_11413_Stachybotrys_chartarum
Psk-9.00130|NA56DRAFT_703776_Pezoloma_ericae_homolog
Psk-9.00137|Micbo1qcDRAFT_129033_Microdochium_bolleyi_homolog
Psk-9.00138|Pa_5_3190_homolog
Psk-9.00142|Pa_7_6640_homolog
Psk-9.00145|Scoty;Note=SS1G_08066_Sclerotinia_sclerotiorum_homolog
Psk-9.00146|Chekof;Pa_6_2440_homolog
Psk-9.00147|Pa_1_1830_fragment
Psk-9.00150|PpBr36_10652_Pyricularia_pennisetigena_homolog
Psk-9.00151|Pa_4_3510_fragment
Psk-9.00154|Pa_6_2490_fragment
Psk-9.00155|GE09DRAFT_1263105_Coniochaeta_sp_homolog
Psk-9.00157|CHGG_09572_Chaetomium_globosum_fragment
Psk-9.00159|MBR_09427_Metarhizium_brunneum_homolog
Psk-9.00160|AJ78_06594_Emergomyces_pasteurianus_homolog
Psk-9.00163|Pa_5_3190_homolog
Psk-9.00164|CSUB01_08519_Colletotrichum_sublineola_homolog;
Psk-9.00168|MYCTH_64320_Thermothelomyces_thermophilus_homolog
Psk-9.00174|DL765_007700_Monosporascus_sp_fragment
