# Supplementary material for: The Enterprise , a massive transposon carrying Spok meiotic drive genes
Source: HighWire-hosted journal article supplement (doi:10.1101/gr.267609.120), 2021-04-19
Supplement: Supplemental_Table_S3_crewcopies.xlsx [file Supplemental_Table_S3_crewcopies.xlsx]

## Sheet: Sheet1
Supplementary Table S3 Copy number of putative homologs to the conserved genes of the Spok block and Enterprise.
Strain	Kirc	Scoty	Chekof	Spok	Uhera
Aaosphaeria arxii CBS 175.79	2	#N/A	#N/A	2	#N/A
Acidomyces richmondensis BFW	#N/A	1	#N/A	2	#N/A
Acidomyces sp. 'richmondensis' meta	#N/A	#N/A	#N/A	3	#N/A
Acremonium chrysogenum ATCC 11550	#N/A	#N/A	1	#N/A	#N/A
Akanthomyces lecanii RCEF 1005	#N/A	#N/A	#N/A	4	#N/A
Akanthomyces lecanii UM487	#N/A	#N/A	2	#N/A	#N/A
Alternaria alternata As-27	#N/A	#N/A	#N/A	1	#N/A
Alternaria alternata FERA 1177	1	#N/A	#N/A	6	#N/A
Alternaria alternata NBRC 8984	#N/A	#N/A	#N/A	1	#N/A
Alternaria alternata Z7	#N/A	#N/A	#N/A	2	#N/A
Alternaria gaisen FERA 650	1	#N/A	#N/A	3	#N/A
Alternaria tenuissima FERA 1164	#N/A	#N/A	#N/A	4	#N/A
Alternaria tenuissima FERA 1166	#N/A	#N/A	#N/A	3	#N/A
Alternaria tenuissima FERA 635	#N/A	#N/A	#N/A	4	#N/A
Alternaria tenuissima FERA 743	#N/A	#N/A	#N/A	4	#N/A
Amniculicola lignicola CBS 123094	1	#N/A	#N/A	2	#N/A
Amorphotheca resinae ATCC 22711	1	#N/A	#N/A	2	#N/A
Antrodiella citrinella DSM 108506	1	#N/A	#N/A	#N/A	#N/A
archaeon	#N/A	#N/A	1	#N/A	#N/A
Armillaria gallica Ar21-2	#N/A	#N/A	3	#N/A	#N/A
Armillaria ostoyae C18/9	#N/A	#N/A	2	#N/A	#N/A
Armillaria solidipes 28-4	#N/A	#N/A	3	#N/A	#N/A
Arthrobotrys oligospora TWF102	#N/A	#N/A	1	#N/A	#N/A
Arthrobotrys oligospora TWF103	#N/A	#N/A	1	#N/A	#N/A
Arthrobotrys oligospora TWF191	1	#N/A	#N/A	#N/A	#N/A
Arthrobotrys oligospora TWF569	#N/A	#N/A	1	#N/A	#N/A
Arthrobotrys oligospora TWF594	#N/A	#N/A	1	#N/A	#N/A
Arthrobotrys oligospora TWF703	#N/A	#N/A	1	#N/A	#N/A
Arthrobotrys oligospora TWF706	#N/A	#N/A	1	#N/A	#N/A
Arthrobotrys oligospora TWF751	#N/A	#N/A	1	#N/A	#N/A
Arthroderma uncinatum CBS 119779	#N/A	#N/A	#N/A	5	#N/A
Ascodesmis nigricans CBS 389.68	1	#N/A	#N/A	#N/A	#N/A
Aspergillus aculeatinus CBS 121060	#N/A	#N/A	#N/A	3	#N/A
Aspergillus aculeatus ATCC 16872	1	1	#N/A	3	#N/A
Aspergillus alliaceus CBS 536.65	1	#N/A	#N/A	4	#N/A
Aspergillus alliaceus IBT 14317	2	#N/A	#N/A	3	#N/A
Aspergillus arachidicola CBS 117610	#N/A	#N/A	#N/A	2	#N/A
Aspergillus arachidicola CBS 117612	#N/A	#N/A	#N/A	6	#N/A
Aspergillus avenaceus IBT 18842	#N/A	#N/A	1	8	#N/A
Aspergillus awamori IFM 58123	2	#N/A	2	19	#N/A
Aspergillus bertholletiae IBT 29228	#N/A	#N/A	#N/A	3	#N/A
Aspergillus bombycis NRRL26010	#N/A	#N/A	#N/A	2	#N/A
Aspergillus brasiliensis CBS 101740	1	#N/A	#N/A	7	#N/A
Aspergillus brunneoviolaceus CBS 621.78	#N/A	#N/A	#N/A	2	#N/A
Aspergillus caelatus CBS 763.97	#N/A	#N/A	#N/A	1	#N/A
Aspergillus calidoustus	3	#N/A	#N/A	7	#N/A
Aspergillus campestris IBT 28561	#N/A	#N/A	#N/A	1	#N/A
Aspergillus candidus CBS 102.13	1	#N/A	#N/A	2	#N/A
Aspergillus carbonarius ITEM 5010	#N/A	#N/A	#N/A	3	#N/A
Aspergillus clavatus NRRL 1	#N/A	#N/A	#N/A	1	#N/A
Aspergillus coremiiformis CBS 553.77	#N/A	#N/A	1	7	#N/A
Aspergillus costaricaensis CBS 115574	#N/A	#N/A	2	5	#N/A
Aspergillus cristatus GZAAS20.1005	1	#N/A	#N/A	11	#N/A
Aspergillus ellipticus CBS 707.79	1	1	1	18	#N/A
Aspergillus eucalypticola CBS 122712	#N/A	#N/A	1	3	#N/A
Aspergillus felis CNM-CM7691	2	#N/A	#N/A	1	#N/A
Aspergillus fijiensis CBS 313.89	#N/A	#N/A	#N/A	2	#N/A
Aspergillus fischeri NRRL 181	3	#N/A	#N/A	#N/A	#N/A
Aspergillus flavus AF13	1	#N/A	#N/A	2	#N/A
Aspergillus flavus AF70	#N/A	#N/A	#N/A	2	#N/A
Aspergillus flavus CA14	1	#N/A	#N/A	2	#N/A
Aspergillus flavus CBS 121.62	1	#N/A	#N/A	4	#N/A
Aspergillus flavus NRRL 118543	#N/A	#N/A	#N/A	3	#N/A
Aspergillus flavus NRRL 21882	1	#N/A	#N/A	1	#N/A
Aspergillus flavus NRRL 30797	1	#N/A	#N/A	5	#N/A
Aspergillus flavus NRRL3357	3	#N/A	#N/A	1	#N/A
Aspergillus fumigatiaffinis CNM-CM5878	2	#N/A	#N/A	4	#N/A
Aspergillus fumigatiaffinis CNM-CM6457	1	#N/A	#N/A	2	#N/A
Aspergillus fumigatiaffinis CNM-CM6805	2	#N/A	#N/A	3	#N/A
Aspergillus fumigatiaffinis CNM-CM8980	2	#N/A	#N/A	5	#N/A
Aspergillus fumigatus A1163	1	#N/A	#N/A	1	#N/A
Aspergillus fumigatus Af293	1	#N/A	#N/A	3	#N/A
Aspergillus fumigatus CNM-CM8057	1	#N/A	#N/A	1	#N/A
Aspergillus fumigatus CNM-CM8686	1	#N/A	#N/A	#N/A	#N/A
Aspergillus fumigatus CNM-CM8689	1	#N/A	#N/A	1	#N/A
Aspergillus fumigatus CNM-CM8812	2	#N/A	#N/A	#N/A	#N/A
Aspergillus fumigatus HMR AF 270	1	#N/A	#N/A	1	#N/A
Aspergillus fumigatus HMR AF 706	#N/A	#N/A	#N/A	2	#N/A
Aspergillus fumigatus Z5	3	#N/A	#N/A	2	#N/A
Aspergillus glaucus CBS 516.65	#N/A	#N/A	1	8	#N/A
Aspergillus heteromorphus CBS 117.55	#N/A	#N/A	2	13	#N/A
Aspergillus hiratsukae CNM-CM5793	5	#N/A	#N/A	2	#N/A
Aspergillus hiratsukae CNM-CM6106	3	#N/A	#N/A	1	#N/A
Aspergillus homomorphus CBS 101889	#N/A	#N/A	#N/A	4	#N/A
Aspergillus ibericus CBS 121593	1	1	1	5	#N/A
Aspergillus indologenus CBS 114.80	#N/A	#N/A	#N/A	5	#N/A
Aspergillus japonicus CBS 114.51	#N/A	#N/A	#N/A	5	#N/A
Aspergillus lentulus CNM-CM6069	2	#N/A	#N/A	1	#N/A
Aspergillus lentulus CNM-CM8060	1	#N/A	#N/A	#N/A	#N/A
Aspergillus lentulus CNM-CM8927	#N/A	#N/A	#N/A	1	#N/A
Aspergillus lentulus IFM 47457	1	#N/A	#N/A	#N/A	#N/A
Aspergillus lentulus IFM 61392	4	#N/A	#N/A	#N/A	#N/A
Aspergillus lentulus IFM 62136	1	#N/A	#N/A	#N/A	#N/A
Aspergillus leporis CBS 151.66	2	#N/A	#N/A	8	#N/A
Aspergillus luchuensis CBS 106.47	#N/A	#N/A	3	9	#N/A
Aspergillus luchuensis IFO 4308	#N/A	#N/A	1	12	#N/A
Aspergillus luchuensis RIB 2604	#N/A	#N/A	1	3	#N/A
Aspergillus minisclerotigenes CBS 117635	#N/A	#N/A	#N/A	3	#N/A
Aspergillus neoniger CBS 115656	#N/A	#N/A	1	4	#N/A
Aspergillus nidulans FGSC A4	2	#N/A	#N/A	3	#N/A
Aspergillus niger An76	#N/A	#N/A	2	3	#N/A
Aspergillus niger ATCC 1015	#N/A	#N/A	#N/A	3	#N/A
Aspergillus niger ATCC 13496	2	#N/A	#N/A	5	#N/A
Aspergillus niger CBS 101883	1	#N/A	#N/A	8	#N/A
Aspergillus niger CBS 513.88	1	#N/A	#N/A	1	#N/A
Aspergillus niger FDAARGOS_311	#N/A	#N/A	#N/A	1	#N/A
Aspergillus niger N402 (ATCC 64974)	#N/A	#N/A	#N/A	1	#N/A
Aspergillus nomiae NRRL 13137	#N/A	#N/A	1	3	#N/A
Aspergillus novofumigatus IBT 16806	3	#N/A	#N/A	1	#N/A
Aspergillus novoparasiticus CBS 126849	#N/A	#N/A	#N/A	4	#N/A
Aspergillus ochraceoroseus IBT 24754	#N/A	#N/A	#N/A	3	#N/A
Aspergillus ochraceoroseus SRRC1432	#N/A	1	1	6	#N/A
Aspergillus oryzae 3.042	#N/A	#N/A	#N/A	1	#N/A
Aspergillus oryzae BCC7051	2	#N/A	#N/A	4	#N/A
Aspergillus oryzae RIB40 RIB 40	1	#N/A	#N/A	4	#N/A
Aspergillus parasiticus CBS 117618	#N/A	#N/A	#N/A	1	#N/A
Aspergillus parasiticus SU-1	#N/A	#N/A	#N/A	1	#N/A
Aspergillus phoenicis ATCC 13157	1	#N/A	#N/A	4	#N/A
Aspergillus piperis CBS 112811	#N/A	#N/A	#N/A	3	#N/A
Aspergillus pseudocaelatus CBS 117616	#N/A	#N/A	#N/A	1	#N/A
Aspergillus pseudonomius CBS 119388	1	#N/A	2	7	#N/A
Aspergillus pseudonomius IBT 12657	#N/A	#N/A	1	4	#N/A
Aspergillus pseudotamarii CBS 117625	#N/A	#N/A	#N/A	2	#N/A
Aspergillus rambellii SRRC1468	#N/A	#N/A	1	5	#N/A
Aspergillus ruber CBS 135680	1	#N/A	#N/A	9	#N/A
Aspergillus saccharolyticus JOP 1030-1	1	#N/A	#N/A	1	#N/A
Aspergillus sclerotialis CBS 366.77	2	#N/A	1	1	#N/A
Aspergillus sclerotiicarbonarius CBS 121057	#N/A	#N/A	3	7	#N/A
Aspergillus sclerotioniger CBS 115572	#N/A	#N/A	#N/A	7	#N/A
Aspergillus sergii CBS 130017	1	#N/A	#N/A	5	#N/A
Aspergillus sp. CLMG-2019a FRR 5400	2	#N/A	#N/A	2	#N/A
Aspergillus sp. HF37	#N/A	#N/A	#N/A	2	#N/A
Aspergillus steynii IBT 23096	1	#N/A	#N/A	5	#N/A
Aspergillus sydowii CBS 593.65	#N/A	#N/A	#N/A	1	#N/A
Aspergillus taichungensis IBT 19404	#N/A	#N/A	2	4	#N/A
Aspergillus tamarii CBS 117626	1	#N/A	1	3	#N/A
Aspergillus tanneri NIH1004	7	#N/A	#N/A	12	1
Aspergillus thermomutatus HMR AF 39	4	#N/A	#N/A	3	1
Aspergillus transmontanensis CBS 130015	#N/A	#N/A	#N/A	4	#N/A
Aspergillus tubingensis CBS 134.48	#N/A	#N/A	2	3	#N/A
Aspergillus tubingensis WU-2223L	#N/A	#N/A	2	2	#N/A
Aspergillus turcosus HMR AF 23	#N/A	1	1	#N/A	#N/A
Aspergillus udagawae IFM 46972	1	#N/A	#N/A	#N/A	#N/A
Aspergillus udagawae IFM 46973	1	#N/A	#N/A	#N/A	#N/A
Aspergillus udagawae IFM 5058	2	#N/A	#N/A	1	#N/A
Aspergillus udagawae IFM 51744	2	#N/A	#N/A	1	1
Aspergillus udagawae IFM 53868	2	#N/A	#N/A	2	#N/A
Aspergillus udagawae IFM 61606	1	#N/A	#N/A	#N/A	#N/A
Aspergillus uvarum CBS 121591	#N/A	#N/A	1	5	#N/A
Aspergillus vadensis CBS 113365	1	#N/A	1	7	#N/A
Aspergillus versicolor CBS 583.65	1	#N/A	#N/A	#N/A	#N/A
Aspergillus violaceofuscus CBS 115571	#N/A	#N/A	#N/A	4	#N/A
Aspergillus welwitschiae CBS 139.54b	1	#N/A	1	12	#N/A
Aspergillus wentii DTO 134E9	1	#N/A	1	#N/A	#N/A
Aspergillus westerdijkiae HDN13-356	#N/A	#N/A	#N/A	1	#N/A
Aureobasidium melanogenum CBS 110374	#N/A	#N/A	1	#N/A	#N/A
Aureobasidium namibiae CBS 147.97	#N/A	#N/A	#N/A	1	#N/A
Aureobasidium pullulans EXF-10659	#N/A	#N/A	1	#N/A	#N/A
Aureobasidium pullulans EXF-11318	#N/A	#N/A	1	#N/A	#N/A
Aureobasidium pullulans EXF-11319	#N/A	#N/A	#N/A	1	#N/A
Aureobasidium pullulans EXF-11991	#N/A	#N/A	#N/A	1	#N/A
Aureobasidium pullulans EXF-3358	#N/A	#N/A	#N/A	1	#N/A
Aureobasidium pullulans EXF-3984	#N/A	#N/A	1	#N/A	#N/A
Aureobasidium pullulans EXF-4256	#N/A	#N/A	#N/A	1	#N/A
Aureobasidium pullulans EXF-6519	#N/A	#N/A	1	#N/A	#N/A
Aureobasidium pullulans EXF-8127	#N/A	#N/A	1	#N/A	#N/A
Aureobasidium pullulans EXF-8128	#N/A	#N/A	#N/A	1	#N/A
Aureobasidium pullulans EXF-8828	#N/A	#N/A	1	#N/A	#N/A
Aureobasidium pullulans EXF-9785	#N/A	#N/A	1	#N/A	#N/A
Beauveria bassiana ARSEF 2860	#N/A	1	1	8	#N/A
Beauveria bassiana ARSEF 8028	#N/A	#N/A	#N/A	6	#N/A
Beauveria bassiana D1-5	#N/A	2	3	7	#N/A
Beauveria bassiana ERL836	#N/A	#N/A	1	5	#N/A
Beauveria bassiana JEF-007	#N/A	#N/A	1	2	#N/A
Beauveria brongniartii RCEF 3172	#N/A	#N/A	#N/A	6	#N/A
Bimuria novae-zelandiae CBS 107.79	1	#N/A	#N/A	2	#N/A
Bipolaris maydis ATCC 48331	1	#N/A	#N/A	#N/A	#N/A
Bipolaris maydis C5	1	#N/A	#N/A	#N/A	#N/A
Bipolaris oryzae ATCC 44560	1	#N/A	#N/A	#N/A	#N/A
Bipolaris zeicola 26-R-13	2	#N/A	#N/A	#N/A	#N/A
Blastomyces dermatitidis ATCC 18188	2	#N/A	#N/A	13	#N/A
Blastomyces dermatitidis ATCC 26199	2	#N/A	#N/A	13	#N/A
Blastomyces dermatitidis ER-3	3	#N/A	#N/A	13	#N/A
Blastomyces gilchristii SLH14081	3	#N/A	#N/A	15	#N/A
Blastomyces parvus UAMH130	#N/A	#N/A	#N/A	6	#N/A
Blastomyces percursus EI222	21	#N/A	#N/A	28	#N/A
Blastomyces silverae UAMH 139	#N/A	#N/A	#N/A	3	#N/A
Bondarzewia mesenterica DSM 108281	2	#N/A	#N/A	#N/A	#N/A
Botryotinia calthae MUCL2830	#N/A	#N/A	1	#N/A	1
Botryotinia convoluta MUCL11595	#N/A	#N/A	#N/A	1	#N/A
Botrytis cinerea BcDW1	#N/A	#N/A	1	#N/A	#N/A
Botrytis galanthina MUCL435	#N/A	#N/A	1	1	#N/A
Botrytis tulipae Bt9001	1	#N/A	#N/A	#N/A	#N/A
Buceros rhinoceros silvestris BGI_N320	#N/A	#N/A	#N/A	#N/A	2
Byssochlamys spectabilis CBS 101075	#N/A	#N/A	#N/A	2	#N/A
Byssochlamys spectabilis No. 5	#N/A	#N/A	#N/A	1	#N/A
Byssothecium circinans CBS 675.92	4	#N/A	#N/A	1	#N/A
Cadophora sp. DSE1049	7	#N/A	#N/A	1	#N/A
Caldilineaceae bacterium SB0662_bin_9	#N/A	#N/A	1	#N/A	#N/A
Caldilineaceae bacterium SB0664_bin_22	#N/A	#N/A	1	#N/A	#N/A
Caldilineaceae bacterium SB0665_bin_21	#N/A	#N/A	1	#N/A	#N/A
Caldilineaceae bacterium SB0666_bin_21	#N/A	#N/A	1	#N/A	#N/A
Candidatus Bathyarchaeota archaeon B6_G12	#N/A	#N/A	1	#N/A	#N/A
Candidatus Bathyarchaeota archaeon das_tool.concoct.117	#N/A	#N/A	1	#N/A	#N/A
Candidatus Bathyarchaeota archaeon MF-4.4.10.23.1.6	#N/A	#N/A	1	#N/A	#N/A
Candidatus Marsarchaeota G2 archaeon BE_D	#N/A	#N/A	1	#N/A	#N/A
Candidatus Marsarchaeota G2 archaeon ECH_B_SAG-C16	#N/A	#N/A	1	#N/A	#N/A
Candidatus Marsarchaeota G2 archaeon ECH_B_SAG-M15	#N/A	#N/A	1	#N/A	#N/A
Candidatus Nitrosarchaeum limnium	#N/A	#N/A	1	#N/A	#N/A
Candidatus Nitrosarchaeum limnium SFB1	#N/A	#N/A	1	#N/A	#N/A
Candidatus Nitrosomarinus sp. GoM_MAG2	#N/A	#N/A	1	#N/A	#N/A
Candidatus Nitrosotalea devanaterra	#N/A	#N/A	1	#N/A	#N/A
Candidatus Nitrosotenuis sp. GW928_bin.17	#N/A	#N/A	1	#N/A	#N/A
Candidatus Nitrosotenuis sp. GW928_bin.18	#N/A	#N/A	1	#N/A	#N/A
Candidatus Nitrosotenuis sp. UBA12288	#N/A	#N/A	1	#N/A	#N/A
Candidatus Nitrosotenuis uzonensis	#N/A	#N/A	1	#N/A	#N/A
Candidatus Termititenax dinenymphae RsDinE6-01	#N/A	#N/A	#N/A	#N/A	1
Capronia coronata CBS 617.96	2	#N/A	#N/A	#N/A	#N/A
Carpinus fangiana Cfa_2016G	#N/A	#N/A	#N/A	1	#N/A
Cenococcum geophilum 1.58	5	#N/A	#N/A	#N/A	#N/A
Ceratobasidium theobromae CT2	1	#N/A	#N/A	#N/A	#N/A
Ceratocystis fimbriata CBS 114723	#N/A	#N/A	#N/A	17	#N/A
Ceratocystis platani CFO	#N/A	#N/A	#N/A	2	#N/A
Cercospora berteroae CBS538.71	1	#N/A	#N/A	1	#N/A
Cercospora zeae-maydis SCOH1-5	#N/A	#N/A	#N/A	1	#N/A
Cercospora zeina CMW25467	#N/A	#N/A	#N/A	1	#N/A
Chaetomium globosum CBS 148.51	#N/A	#N/A	#N/A	3	1
Chaetothyriales sp. CBS 134916	4	#N/A	#N/A	3	#N/A
Chaetothyriales sp. CBS 134920	#N/A	#N/A	#N/A	2	#N/A
Chaetothyriales sp. CBS 135597	#N/A	#N/A	#N/A	1	#N/A
Chlamydomonas reinhardtii CC-503 cw92 mt+	#N/A	#N/A	#N/A	#N/A	1
Chlorociboria aeruginascens IHIA39	2	#N/A	#N/A	3	#N/A
Chrysochromulina tobinii CCMP291	#N/A	#N/A	#N/A	#N/A	1
Cladophialophora carrionii CBS 160.54	#N/A	#N/A	#N/A	#N/A	1
Cladophialophora immunda CBS 110551	3	#N/A	#N/A	#N/A	#N/A
Cladophialophora immunda CBS 83496	1	#N/A	#N/A	#N/A	#N/A
Cladophialophora psammophila CBS 110553	3	#N/A	#N/A	#N/A	#N/A
Clathrospora elynae CBS 161.51	2	1	#N/A	#N/A	#N/A
Claviceps purpurea 20.1	#N/A	#N/A	#N/A	27	#N/A
Clohesyomyces aquaticus CBS 115471	1	#N/A	#N/A	1	#N/A
Coccidioides immitis H538.4	#N/A	#N/A	#N/A	11	#N/A
Coccidioides immitis RMSCC 2394	1	#N/A	#N/A	15	#N/A
Coccidioides immitis RMSCC 3703	1	#N/A	#N/A	10	#N/A
Coccidioides immitis RS	2	#N/A	#N/A	14	#N/A
Coccidioides immitis WA_211	1	#N/A	#N/A	6	#N/A
Coccidioides posadasii C735 delta SOWgp	1	#N/A	#N/A	9	#N/A
Coccidioides posadasii RMSCC 3488	2	#N/A	#N/A	10	#N/A
Coccidioides posadasii str. Silveira	2	#N/A	#N/A	13	#N/A
Colletotrichum aenigma Cg56	1	#N/A	#N/A	#N/A	#N/A
Colletotrichum fioriniae PJ7	#N/A	#N/A	#N/A	1	#N/A
Colletotrichum fructicola Cf413	1	#N/A	#N/A	#N/A	#N/A
Colletotrichum fructicola Cf415	#N/A	#N/A	#N/A	1	#N/A
Colletotrichum fructicola CfS4	#N/A	1	#N/A	1	#N/A
Colletotrichum fructicola Cg38 S1	2	#N/A	#N/A	#N/A	2
Colletotrichum fructicola CGMCC3.17371	2	1	#N/A	4	1
Colletotrichum fructicola Nara gc5	2	#N/A	#N/A	1	6
Colletotrichum higginsianum IMI 349063	#N/A	#N/A	#N/A	#N/A	1
Colletotrichum higginsianum MAFF305635-RFP	#N/A	#N/A	#N/A	#N/A	2
Colletotrichum incanum MAFF 238704	1	#N/A	#N/A	1	3
Colletotrichum incanum MAFF238712	1	#N/A	#N/A	#N/A	1
Colletotrichum musicola LFN0074	#N/A	#N/A	#N/A	3	#N/A
Colletotrichum nymphaeae SA-01	1	#N/A	#N/A	3	#N/A
Colletotrichum orchidophilum IMI 309357	#N/A	#N/A	#N/A	3	#N/A
Colletotrichum plurivorum LFN00145	1	#N/A	#N/A	6	1
Colletotrichum salicis CBS 607.94	#N/A	#N/A	#N/A	3	#N/A
Colletotrichum scovillei TJNH1	#N/A	#N/A	#N/A	1	#N/A
Colletotrichum sojae LFN0009	#N/A	#N/A	#N/A	3	#N/A
Colletotrichum sublineola TX430BB	1	#N/A	#N/A	1	3
Colletotrichum tofieldiae 0861	2	#N/A	#N/A	#N/A	2
Colletotrichum truncatum CMES1059	1	#N/A	#N/A	#N/A	#N/A
Coniochaeta ligniaria NRRL 30616	#N/A	#N/A	1	#N/A	1
Coniochaeta pulveracea CAB683	#N/A	1	1	1	#N/A
Coniochaeta sp. 2T2.1	6	#N/A	#N/A	1	2
Coniosporium apollinis CBS 100218	#N/A	#N/A	#N/A	1	#N/A
Cordyceps fumosorosea ARSEF 2679	#N/A	1	#N/A	9	#N/A
Cordyceps javanica IJ1G	#N/A	1	1	4	#N/A
Cordyceps javanica IJ2G	#N/A	#N/A	#N/A	1	#N/A
Cordyceps militaris ATCC 34164	#N/A	1	1	4	#N/A
Cordyceps militaris CM01	#N/A	1	1	6	#N/A
Cordyceps sp. RAO-2017 1346	#N/A	#N/A	#N/A	3	#N/A
Corynespora cassiicola Philippines	4	#N/A	#N/A	2	#N/A
Crenarchaeota archaeon L_MaxBin.140	#N/A	#N/A	1	#N/A	#N/A
Cryomyces minteri CCFEE 5187	#N/A	#N/A	#N/A	1	#N/A
Cryphonectria parasitica EP155	2	#N/A	#N/A	4	#N/A
Cudoniella acicularis DSM 108380	3	#N/A	#N/A	1	#N/A
Cyphellophora europaea CBS 101466	7	#N/A	#N/A	1	#N/A
Cytobacillus oceanisediminis	#N/A	#N/A	#N/A	#N/A	1
Cytospora leucostoma SXYLt	#N/A	#N/A	#N/A	1	1
Daldinia sp. EC12	#N/A	#N/A	#N/A	5	#N/A
Delitschia confertaspora ATCC 74209	#N/A	1	1	1	#N/A
Delphinella strobiligena CBS 735.71	1	#N/A	#N/A	1	#N/A
Dendrothele bispora CBS 962.96	#N/A	#N/A	1	#N/A	#N/A
Diaporthe helianthi 7/96	#N/A	#N/A	1	6	#N/A
Didymella heteroderae 28M1	#N/A	#N/A	#N/A	2	#N/A
Didymella keratinophila 9M1	#N/A	#N/A	#N/A	1	#N/A
Didymosphaeria enalia CBS 304.66	2	#N/A	#N/A	1	#N/A
Diplodia corticola CBS 112549	#N/A	#N/A	#N/A	1	#N/A
Drechmeria coniospora ARSEF 6962	#N/A	2	#N/A	1	#N/A
Drechmeria coniospora ATCC 96282	#N/A	1	#N/A	1	#N/A
Drosophila melanogaster MW63	#N/A	#N/A	#N/A	#N/A	1
Elsinoe australis Hillstone_2	#N/A	#N/A	1	#N/A	#N/A
Emergomyces pasteurianus Ep9510 UAMH 9510	#N/A	#N/A	#N/A	15	#N/A
Emmonsia crescens UAMH 3008	3	#N/A	#N/A	12	#N/A
Emmonsia crescens UAMH4076	#N/A	#N/A	#N/A	9	#N/A
Emmonsia sp. CAC-2015a CBS 136260	2	#N/A	#N/A	6	#N/A
Endocarpon pusillum Z07020	2	#N/A	#N/A	#N/A	#N/A
Eremomyces bilateralis CBS 781.70	2	#N/A	#N/A	4	#N/A
Escovopsis weberi	#N/A	#N/A	1	#N/A	#N/A
Exidia glandulosa HHB12029	#N/A	#N/A	2	#N/A	#N/A
Exophiala aquamarina CBS 119918	1	#N/A	#N/A	#N/A	#N/A
Exophiala dermatitidis NIH/UT8656	1	#N/A	#N/A	#N/A	#N/A
Exophiala mesophila CBS 40295	3	#N/A	#N/A	#N/A	#N/A
Exophiala mesophila CCFEE 6314	1	#N/A	#N/A	#N/A	#N/A
Exophiala oligosperma CBS 72588	11	#N/A	#N/A	1	#N/A
Exophiala xenobiotica CBS 118157	3	#N/A	#N/A	#N/A	#N/A
Exserohilum turcica Et28A	1	#N/A	#N/A	1	#N/A
Fomitopsis pinicola FP-58527 SS1	#N/A	#N/A	1	#N/A	#N/A
Fomitopsis rosea DSM 105464	1	#N/A	#N/A	#N/A	#N/A
Fonsecaea erecta CBS 125763	2	#N/A	#N/A	1	1
Fonsecaea monophora CBS 269.37	2	#N/A	#N/A	#N/A	#N/A
Fonsecaea multimorphosa CBS 102226	#N/A	#N/A	#N/A	2	#N/A
Fonsecaea nubica CBS 269.64	1	#N/A	#N/A	1	#N/A
Fonsecaea pedrosoi CBS 271.37	2	#N/A	#N/A	3	#N/A
fungal sp. No.11243	#N/A	#N/A	#N/A	2	#N/A
fungal sp. No.14919	#N/A	1	1	3	1
Fusarium acutatum NRRL 13308	#N/A	#N/A	#N/A	1	#N/A
Fusarium agapanthi NRRL 31653	#N/A	#N/A	#N/A	3	#N/A
Fusarium albosuccineum NRRL 20459	1	#N/A	1	6	4
Fusarium ambrosium NRRL 20438	1	2	4	8	#N/A
Fusarium anthophilum NRRL 25214	#N/A	#N/A	#N/A	2	#N/A
Fusarium austroafricanum NRRL 53441	2	#N/A	#N/A	4	#N/A
Fusarium austroamericanum NRRL 2903	1	#N/A	#N/A	#N/A	#N/A
Fusarium avenaceum Fa05001	#N/A	#N/A	1	#N/A	#N/A
Fusarium beomiforme NRRL 25174	#N/A	#N/A	1	5	#N/A
Fusarium bulbicola NRRL 25176	#N/A	#N/A	#N/A	4	#N/A
Fusarium coicis NRRL 66233	1	#N/A	1	2	#N/A
Fusarium decemcellulare NRRL 13412	1	#N/A	3	1	3
Fusarium denticulatum NRRL 25311	#N/A	#N/A	#N/A	1	#N/A
Fusarium euwallaceae UCR1854	#N/A	2	6	11	#N/A
Fusarium flagelliforme NRRL 13405	1	#N/A	#N/A	1	#N/A
Fusarium floridanum NRRL62606	4	2	3	8	#N/A
Fusarium fujikuroi B14	#N/A	#N/A	#N/A	1	#N/A
Fusarium fujikuroi CSV1	#N/A	#N/A	1	#N/A	#N/A
Fusarium fujikuroi E282	1	#N/A	#N/A	1	#N/A
Fusarium fujikuroi FGSC 8932	1	#N/A	#N/A	#N/A	#N/A
Fusarium fujikuroi KSU 3368	#N/A	#N/A	1	#N/A	#N/A
Fusarium fujikuroi KSU X-10626	#N/A	#N/A	1	1	#N/A
Fusarium fujikuroi NCIM1100	#N/A	#N/A	#N/A	3	#N/A
Fusarium gaditjirri NRRL 45417	#N/A	#N/A	1	#N/A	#N/A
Fusarium globosum NRRL 26131	#N/A	#N/A	1	4	#N/A
Fusarium graminearum ITEM 124	#N/A	#N/A	#N/A	1	#N/A
Fusarium graminearum MDC_Fg13	#N/A	#N/A	#N/A	1	#N/A
Fusarium heterosporum NRRL 20693	#N/A	#N/A	1	2	#N/A
Fusarium kuroshium UCR3666	1	2	6	8	#N/A
Fusarium langsethiae Fl201059	2	#N/A	#N/A	5	#N/A
Fusarium longipes NRRL 20695	#N/A	#N/A	1	#N/A	#N/A
Fusarium mangiferae MRC7560	3	#N/A	#N/A	6	#N/A
Fusarium mexicanum NRRL 53147	1	#N/A	1	#N/A	#N/A
Fusarium mundagurra NRRL 66235	#N/A	#N/A	1	3	#N/A
Fusarium napiforme NRRL 25196	#N/A	#N/A	1	#N/A	#N/A
Fusarium nygamai CS10214	#N/A	#N/A	#N/A	6	#N/A
Fusarium odoratissimum NRRL 54006	#N/A	#N/A	#N/A	3	#N/A
Fusarium odoratissimum race 4	#N/A	#N/A	#N/A	4	#N/A
Fusarium oxysporum f. sp. cepae FoC_125	#N/A	#N/A	#N/A	12	#N/A
Fusarium oxysporum f. sp. cepae FoC_A23	#N/A	#N/A	#N/A	7	#N/A
Fusarium oxysporum f. sp. cepae FoC_Fus2	#N/A	#N/A	#N/A	14	#N/A
Fusarium oxysporum f. sp. conglutinans Fo5176	1	#N/A	#N/A	21	#N/A
Fusarium oxysporum f. sp. conglutinans race 2 54008	#N/A	#N/A	#N/A	4	#N/A
Fusarium oxysporum f. sp. cubense 160527	#N/A	#N/A	1	5	#N/A
Fusarium oxysporum f. sp. cubense race 1	#N/A	#N/A	#N/A	2	#N/A
Fusarium oxysporum f. sp. cubense TR4	#N/A	#N/A	#N/A	4	#N/A
Fusarium oxysporum f. sp. lycopersici 4287	1	#N/A	1	22	#N/A
Fusarium oxysporum f. sp. lycopersici MN25	1	#N/A	#N/A	4	#N/A
Fusarium oxysporum f. sp. melonis 26406	#N/A	#N/A	#N/A	2	#N/A
Fusarium oxysporum f. sp. narcissi N139	1	#N/A	#N/A	13	#N/A
Fusarium oxysporum f. sp. pisi HDV247	1	#N/A	#N/A	8	#N/A
Fusarium oxysporum f. sp. radicis-cucumerinum Forc016	#N/A	#N/A	#N/A	9	#N/A
Fusarium oxysporum f. sp. radicis-lycopersici 26381	#N/A	#N/A	#N/A	6	#N/A
Fusarium oxysporum f. sp. raphani 54005	2	#N/A	1	5	#N/A
Fusarium oxysporum f. sp. vasinfectum 25433	#N/A	#N/A	#N/A	10	#N/A
Fusarium oxysporum Fo_A13	#N/A	#N/A	1	7	#N/A
Fusarium oxysporum Fo_A28	#N/A	#N/A	#N/A	5	#N/A
Fusarium oxysporum Fo_CB3	1	#N/A	1	5	#N/A
Fusarium oxysporum Fo_PG	#N/A	#N/A	#N/A	5	#N/A
Fusarium oxysporum Fo47	2	#N/A	#N/A	6	#N/A
Fusarium oxysporum Fo5176	2	#N/A	#N/A	5	#N/A
Fusarium oxysporum NRRL 32931	3	#N/A	#N/A	6	#N/A
Fusarium oxysporum NRRL 39464	#N/A	#N/A	#N/A	2	#N/A
Fusarium oxysporum V64-1	1	#N/A	#N/A	3	#N/A
Fusarium phyllophilum NRRL 13617	#N/A	#N/A	1	#N/A	#N/A
Fusarium poae 2516	3	#N/A	1	30	#N/A
Fusarium proliferatum ET1	#N/A	#N/A	#N/A	2	#N/A
Fusarium proliferatum Fp_A8	#N/A	#N/A	1	1	#N/A
Fusarium proliferatum ITEM 2341	1	#N/A	1	6	#N/A
Fusarium proliferatum NRRL62905	#N/A	#N/A	#N/A	1	#N/A
Fusarium pseudoanthophilum NRRL 25211	1	#N/A	#N/A	#N/A	#N/A
Fusarium pseudocircinatum NRRL 36939	#N/A	#N/A	#N/A	1	#N/A
Fusarium pseudograminearum CS3096	#N/A	#N/A	1	1	#N/A
Fusarium pseudograminearum RBG5266	#N/A	#N/A	#N/A	1	#N/A
Fusarium sarcochroum NRRL 20472	2	#N/A	#N/A	5	#N/A
Fusarium sp. AF-4 NRRL62579	3	3	6	9	#N/A
Fusarium sp. AF-6 NRRL62590	#N/A	2	3	3	#N/A
Fusarium sp. AF-8 NRRL62584	2	3	6	7	#N/A
Fusarium sp. NRRL 25303	#N/A	#N/A	#N/A	2	#N/A
Fusarium sp. NRRL 52700	#N/A	#N/A	1	#N/A	#N/A
Fusarium sp. NRRL 66182	#N/A	1	2	7	#N/A
Fusarium tjaetaba NRRL 66243	#N/A	#N/A	1	#N/A	#N/A
Fusarium vanettenii 77-13-4	#N/A	2	2	9	#N/A
Fusarium venenatum A3/5	#N/A	#N/A	#N/A	1	#N/A
Fusarium verticillioides 7600	1	#N/A	#N/A	1	#N/A
Fusarium zealandicum NRRL 22465	#N/A	#N/A	#N/A	2	#N/A
Gaeumannomyces tritici R3-111a-1	6	2	2	#N/A	#N/A
Ganoderma boninense	1	#N/A	1	#N/A	#N/A
Ganoderma sinense ZZ0214-1	#N/A	#N/A	1	#N/A	#N/A
Geosmithia morbida 1262	#N/A	#N/A	#N/A	19	#N/A
Gloeophyllum trabeum ATCC 11539	1	#N/A	#N/A	#N/A	#N/A
Glomus cerebriforme DAOM 227022	#N/A	#N/A	#N/A	1	#N/A
Glonium stellatum CBS 207.34	3	#N/A	#N/A	2	#N/A
Grosmannia clavigera kw1407	#N/A	#N/A	#N/A	9	2
Gymnopus luxurians FD-317 M1	#N/A	#N/A	2	#N/A	#N/A
Helicocarpus griseus UAMH5409	3	#N/A	#N/A	4	#N/A
Helotiales sp. DMI_Dod_QoI	#N/A	#N/A	#N/A	1	#N/A
Hirsutella minnesotensis 3608	#N/A	#N/A	1	19	#N/A
Histoplasma capsulatum G186AR	1	#N/A	#N/A	7	#N/A
Histoplasma capsulatum H143	1	#N/A	#N/A	6	#N/A
Histoplasma capsulatum H88	#N/A	#N/A	#N/A	4	#N/A
Histoplasma capsulatum NAm1	4	#N/A	#N/A	25	#N/A
Hortaea werneckii EXF-10513	#N/A	#N/A	#N/A	3	#N/A
Hortaea werneckii EXF-120	#N/A	#N/A	#N/A	1	#N/A
Hortaea werneckii EXF-151	#N/A	#N/A	#N/A	3	#N/A
Hortaea werneckii EXF-171	#N/A	#N/A	#N/A	2	#N/A
Hortaea werneckii EXF-2000	#N/A	#N/A	#N/A	1	#N/A
Hortaea werneckii EXF-2682	#N/A	#N/A	#N/A	1	#N/A
Hortaea werneckii EXF-6656	#N/A	#N/A	#N/A	1	#N/A
Hyaloscypha bicolor E	#N/A	#N/A	#N/A	1	#N/A
Hyaloscypha variabilis F	#N/A	#N/A	1	#N/A	1
Hydnomerulius pinastri MD-312	1	#N/A	#N/A	#N/A	#N/A
Hypoxylon sp. CI-4A	#N/A	#N/A	#N/A	2	#N/A
Hypsizygus marmoreus 51987-8	#N/A	#N/A	2	#N/A	#N/A
Kalmanozyma brasiliensis GHG001	#N/A	#N/A	#N/A	1	#N/A
Kockovaella imperatae NRRL Y-17943	#N/A	#N/A	#N/A	1	#N/A
Laccaria amethystina LaAM-08-1	#N/A	#N/A	1	#N/A	#N/A
Laccaria bicolor S238N-H82	#N/A	#N/A	2	#N/A	#N/A
Lachnellula arida CBS 203.66	2	#N/A	#N/A	#N/A	#N/A
Lachnellula suecica CBS 268.59	1	#N/A	#N/A	#N/A	1
Lachnellula willkommii CBS 172.35	#N/A	#N/A	#N/A	1	#N/A
Lasallia pustulata	3	#N/A	#N/A	3	#N/A
Lasallia pustulata A1-1	2	#N/A	#N/A	3	#N/A
Lentithecium fluviatile CBS 122367	1	#N/A	#N/A	2	#N/A
Lepidopterella palustris CBS 459.81	6	#N/A	#N/A	1	#N/A
Leptosphaeria maculans JN3 v23.1.3	#N/A	#N/A	#N/A	1	#N/A
Letharia columbiana WasteWater2	#N/A	#N/A	#N/A	1	1
Letharia lupina WasteWater1	1	#N/A	#N/A	1	#N/A
Lindgomyces ingoldianus ATCC 200398	1	#N/A	#N/A	1	#N/A
Lineolata rhizophorae ATCC 16933	#N/A	1	#N/A	3	#N/A
Lipomyces starkeyi NRRL Y-11557	#N/A	#N/A	#N/A	3	#N/A
Lizonia empirigonia CBS 542.76	1	2	#N/A	13	#N/A
Lobosporangium transversale NRRL 3116	#N/A	#N/A	#N/A	1	#N/A
Lomentospora prolificans JHH-5317	#N/A	#N/A	#N/A	1	#N/A
Lophiostoma macrostomum CBS 122681	3	#N/A	#N/A	1	#N/A
Lophiotrema nucula CBS 627.86	#N/A	#N/A	#N/A	1	#N/A
Macrophomina phaseolina MS6	1	#N/A	#N/A	2	#N/A
Macrostomum lignano DV1	#N/A	#N/A	#N/A	#N/A	1
Macroventuria anomochaeta CBS 525.71	#N/A	#N/A	#N/A	3	#N/A
Madurella mycetomatis mm55	#N/A	2	2	2	#N/A
Magnaporthiopsis poae ATCC 64411	#N/A	1	2	#N/A	#N/A
Marine Group I thaumarchaeote	#N/A	#N/A	2	#N/A	#N/A
Marinobacterium sp. AK27	#N/A	#N/A	#N/A	#N/A	1
Marinobacterium zhoushanense	#N/A	#N/A	#N/A	#N/A	1
Marssonina coronariae NL1	#N/A	#N/A	#N/A	1	#N/A
Massarina eburnea CBS 473.64	#N/A	#N/A	1	1	#N/A
Melanomma pulvis-pyrius CBS 109.77	1	#N/A	#N/A	4	#N/A
Mesorhizobium sp. N.Ca.IN.017.02.1	#N/A	#N/A	#N/A	#N/A	1
Metarhizium acridum CQMa 102	1	#N/A	#N/A	5	#N/A
Metarhizium album ARSEF 1941	#N/A	#N/A	#N/A	4	#N/A
Metarhizium anisopliae ARSEF 549	#N/A	#N/A	1	2	#N/A
Metarhizium anisopliae BRIP 53284	1	#N/A	#N/A	1	#N/A
Metarhizium anisopliae BRIP 53293	1	#N/A	#N/A	4	#N/A
Metarhizium anisopliae E6	#N/A	#N/A	#N/A	4	#N/A
Metarhizium anisopliae JEF-290	1	#N/A	#N/A	12	#N/A
Metarhizium brunneum 4556	#N/A	#N/A	#N/A	3	#N/A
Metarhizium brunneum ARSEF 3297	#N/A	#N/A	1	6	#N/A
Metarhizium guizhouense ARSEF 977	1	#N/A	1	9	#N/A
Metarhizium majus ARSEF 297	2	#N/A	#N/A	9	#N/A
Metarhizium rileyi Cep018-CH2	1	1	3	17	#N/A
Metarhizium rileyi RCEF 4871	1	1	3	17	#N/A
Metarhizium robertsii ARSEF 23	1	#N/A	1	6	#N/A
Metarhizium robertsii ARSEF 2575	1	#N/A	#N/A	5	#N/A
Methanocella sp. PtaU1.Bin125	#N/A	#N/A	1	#N/A	#N/A
Microdochium bolleyi J235TASD1	#N/A	#N/A	#N/A	7	#N/A
Microsporum canis CBS 113480	1	#N/A	#N/A	10	#N/A
Microthyrium microscopicum CBS 115976	1	#N/A	#N/A	#N/A	#N/A
Moelleriella libera RCEF 2490	#N/A	#N/A	#N/A	1	#N/A
Monascus purpureus HQ1	1	#N/A	1	5	#N/A
Monilinia fructicola Mfrc123	#N/A	#N/A	#N/A	1	#N/A
Monilinia fructigena Mfrg269	#N/A	#N/A	#N/A	7	#N/A
Monilinia laxa Mlax316	#N/A	#N/A	1	#N/A	#N/A
Monosporascus cannonballus CBS 586.93	#N/A	#N/A	#N/A	1	1
Monosporascus cannonballus CBS 609.92	#N/A	#N/A	#N/A	2	1
Monosporascus ibericus CBS 110550	1	#N/A	#N/A	3	#N/A
Monosporascus sp. 5C6A	2	#N/A	#N/A	2	#N/A
Monosporascus sp. CRB-8-3	1	#N/A	#N/A	#N/A	#N/A
Monosporascus sp. GIB2	#N/A	#N/A	#N/A	2	#N/A
Monosporascus sp. MC13-8B	#N/A	#N/A	#N/A	2	1
Monosporascus sp. MG133	2	#N/A	#N/A	1	#N/A
Monosporascus sp. mg162 MG162	1	#N/A	#N/A	1	#N/A
Mycena chlorophos	#N/A	#N/A	1	#N/A	#N/A
Mytilinidion resinicola CBS 304.34	4	#N/A	#N/A	3	#N/A
Nannizzia gypsea CBS 118893	#N/A	#N/A	#N/A	5	#N/A
Nannochloropsis gaditana B-31	#N/A	#N/A	#N/A	#N/A	1
Nannochloropsis salina CCMP1776	#N/A	#N/A	#N/A	#N/A	1
Neonectria ditissima R09/05	1	#N/A	3	6	1
Neopestalotiopsis clavispora IHI 201606	#N/A	#N/A	#N/A	#N/A	1
Nitrosarchaeum koreense	#N/A	#N/A	1	#N/A	#N/A
Nitrosarchaeum sp. AC2	#N/A	#N/A	1	#N/A	#N/A
Nitrosarchaeum sp. Baikal-deep-G180	#N/A	#N/A	1	#N/A	#N/A
Nitrosarchaeum sp. BD3	#N/A	#N/A	1	#N/A	#N/A
Nitrosarchaeum sp. GW199_bin.3	#N/A	#N/A	1	#N/A	#N/A
Nitrosarchaeum sp. MC17_S15_bin_49	#N/A	#N/A	1	#N/A	#N/A
Nitrosarchaeum sp. WB-IL-22	#N/A	#N/A	1	#N/A	#N/A
Nitrosopumilaceae archaeon LBMAG_Thaumarchaeota_hypo.bin1_Ca.Nitrosoarchaeu m	#N/A	#N/A	1	#N/A	#N/A
Nitrosopumilaceae archaeon PowLak16_MAG35	#N/A	#N/A	1	#N/A	#N/A
Nitrosopumilaceae archaeon S3bin1	#N/A	#N/A	1	#N/A	#N/A
Nitrosopumilaceae archaeon W1bin1	#N/A	#N/A	1	#N/A	#N/A
Nitrosopumilaceae archaeon W2bin3	#N/A	#N/A	1	#N/A	#N/A
Nitrosopumilaceae archaeon WBC_8_2B_285	#N/A	#N/A	1	#N/A	#N/A
Nitrosopumilales archaeon CG_4_10_14_0_8_um_filter_34_8	#N/A	#N/A	1	#N/A	#N/A
Nitrosopumilales archaeon CG15_BIG_FIL_POST_REV_8_21_14_020_33_23	#N/A	#N/A	1	#N/A	#N/A
Nitrosopumilus sp. MH-Pat-all_metabat2_16	#N/A	#N/A	1	#N/A	#N/A
Nitrosopumilus sp. SS_bin_47	#N/A	#N/A	1	#N/A	#N/A
Nitrosopumilus ureiphilus	#N/A	#N/A	1	#N/A	#N/A
Nitrososphaeria archaeon WBC_8_2A_255	#N/A	#N/A	1	#N/A	#N/A
Nitrososphaeria archaeon WBC_9_1A_223	#N/A	#N/A	1	#N/A	#N/A
Oidiodendron maius Zn	1	#N/A	#N/A	#N/A	#N/A
Ophiobolus disseminans CBS 113818	#N/A	#N/A	#N/A	1	#N/A
Ophiocordyceps australis 1348a	#N/A	#N/A	#N/A	3	#N/A
Ophiocordyceps australis Map64	#N/A	#N/A	#N/A	3	#N/A
Ophiocordyceps camponoti-floridani EC05	#N/A	#N/A	2	3	#N/A
Ophiocordyceps camponoti-leonardi (nom. inval.) BCC 80369	#N/A	#N/A	1	6	#N/A
Ophiocordyceps camponoti-rufipedis Map16	#N/A	1	1	3	#N/A
Ophiocordyceps camponoti-saundersi (nom. inval.) BCC 79314	#N/A	#N/A	#N/A	3	#N/A
Ophiocordyceps polyrhachis-furcata BCC 54312	#N/A	#N/A	1	5	#N/A
Ophiocordyceps sinensis CO18	#N/A	#N/A	2	3	#N/A
Ophiocordyceps sinensis IOZ07	#N/A	1	1	2	#N/A
Ophiocordyceps unilateralis SC16a	#N/A	#N/A	1	9	#N/A
Ophiostoma piceae UAMH 11346	#N/A	1	1	11	#N/A
Paracoccidioides brasiliensis CNH	#N/A	#N/A	#N/A	5	#N/A
Paracoccidioides brasiliensis Pb03	#N/A	#N/A	#N/A	8	#N/A
Paracoccidioides brasiliensis Pb18	#N/A	#N/A	#N/A	6	#N/A
Paracoccidioides brasiliensis Pb300	#N/A	#N/A	#N/A	6	#N/A
Paracoccidioides lutzii Pb01	#N/A	#N/A	#N/A	7	#N/A
Patellaria atrata CBS 101060	#N/A	#N/A	#N/A	2	#N/A
Paxillus involutus ATCC 200175	1	#N/A	#N/A	#N/A	#N/A
Penicilliopsis zonata CBS 506.65	#N/A	#N/A	#N/A	3	#N/A
Penicillium antarcticum IBT 31811	1	#N/A	2	8	#N/A
Penicillium arizonense CBS 141311	1	#N/A	2	5	#N/A
Penicillium brasilianum	2	#N/A	1	1	#N/A
Penicillium brasilianum LaBioMMi 136	#N/A	#N/A	1	#N/A	#N/A
Penicillium camemberti FM013	4	#N/A	1	10	#N/A
Penicillium chrysogenum P2niaD18	#N/A	#N/A	#N/A	11	#N/A
Penicillium coprophilum IBT 31321	#N/A	#N/A	#N/A	1	#N/A
Penicillium decumbens IBT 11843	#N/A	#N/A	#N/A	6	#N/A
Penicillium digitatum Pd1	1	#N/A	#N/A	7	#N/A
Penicillium digitatum PHI26	3	#N/A	#N/A	12	#N/A
Penicillium expansum CMP-1	#N/A	#N/A	1	2	#N/A
Penicillium expansum d1	#N/A	#N/A	1	1	#N/A
Penicillium expansum MD-8	#N/A	#N/A	#N/A	3	#N/A
Penicillium flavigenum IBT 14082	1	#N/A	1	4	#N/A
Penicillium freii DAOM 242723	1	#N/A	2	3	#N/A
Penicillium griseofulvum PG3	1	#N/A	#N/A	3	#N/A
Penicillium italicum PHI-1	#N/A	#N/A	2	5	#N/A
Penicillium nalgiovense IBT 13039	3	#N/A	1	21	#N/A
Penicillium nordicum DAOMC 185683	1	#N/A	1	6	#N/A
Penicillium oxalicum 114-2	#N/A	#N/A	#N/A	3	#N/A
Penicillium polonicum IBT 4502	#N/A	#N/A	#N/A	3	#N/A
Penicillium rolfsii F1880	#N/A	#N/A	#N/A	1	#N/A
Penicillium roqueforti FM164	#N/A	#N/A	#N/A	12	#N/A
Penicillium rubens 43M1	#N/A	#N/A	2	16	#N/A
Penicillium rubens Wisconsin 54-1255	1	#N/A	2	7	#N/A
Penicillium solitum IBT 29525	1	#N/A	2	3	#N/A
Penicillium sp. 'occitanis' CL100	#N/A	#N/A	1	2	#N/A
Penicillium sp. 'occitanis' CT1	#N/A	#N/A	#N/A	1	#N/A
Penicillium sp. str. #12	#N/A	#N/A	2	11	#N/A
Penicillium steckii IBT 24891	#N/A	1	#N/A	2	#N/A
Penicillium subrubescens CBS 132785	#N/A	#N/A	#N/A	4	#N/A
Penicillium vulpinum IBT 29486	1	#N/A	2	6	#N/A
Peniophora sp. CBMAI 1063	#N/A	#N/A	1	#N/A	#N/A
Peniophora sp. CONT	#N/A	#N/A	1	#N/A	#N/A
Periconia macrospinosa DSE2036	#N/A	#N/A	#N/A	3	#N/A
Pestalotiopsis fici W106-1	1	#N/A	#N/A	#N/A	#N/A
Pezoloma ericae UAMH 7357	1	#N/A	#N/A	2	#N/A
Phaeomoniella chlamydospora UCRPC4	2	#N/A	#N/A	#N/A	#N/A
Phialemoniopsis curvata D216	#N/A	#N/A	#N/A	1	#N/A
Phialocephala scopiformis CBS 120377	2	#N/A	#N/A	1	1
Phialocephala subalpina UAMH 11012	2	#N/A	#N/A	1	#N/A
Phialophora americana CBS 27337	1	#N/A	#N/A	#N/A	1
Piedraia hortae CBS 480.64	#N/A	#N/A	#N/A	1	#N/A
Piloderma croceum F 1598	#N/A	#N/A	1	#N/A	#N/A
Pisolithus microcarpus 441	1	#N/A	1	#N/A	#N/A
Plenodomus tracheiphilus IPT5	#N/A	#N/A	#N/A	1	#N/A
Pochonia chlamydosporia 123	1	#N/A	#N/A	2	#N/A
Pochonia chlamydosporia 170	#N/A	#N/A	#N/A	6	#N/A
Podospora anserina S mat+	1	1	4	5	#N/A
Podospora anserina T	#N/A	#N/A	#N/A	1	#N/A
Podospora anserina Wa87	#N/A	#N/A	#N/A	2	#N/A
Podospora comata T	#N/A	#N/A	2	2	#N/A
Polyplosphaeria fusca CBS 125425	1	#N/A	#N/A	1	#N/A
Polyporus arcularius HHB13444	#N/A	#N/A	1	#N/A	#N/A
Polyporus brumalis BRFM 1820	#N/A	#N/A	1	#N/A	#N/A
Polytolypa hystricis UAMH7299	5	#N/A	1	9	#N/A
Powellomyces hirtus CBS 809.83	#N/A	#N/A	1	#N/A	#N/A
Pseudogymnoascus destructans 20631-21	2	#N/A	1	14	#N/A
Pseudogymnoascus sp. 03VT05	1	#N/A	1	5	#N/A
Pseudogymnoascus sp. 05NY08	1	#N/A	#N/A	1	#N/A
Pseudogymnoascus sp. 23342-1-I1	1	#N/A	1	1	#N/A
Pseudogymnoascus sp. 24MN13	1	#N/A	#N/A	2	#N/A
Pseudogymnoascus sp. VKM F-103	2	#N/A	#N/A	1	#N/A
Pseudogymnoascus sp. VKM F-3557	1	#N/A	1	7	#N/A
Pseudogymnoascus sp. VKM F-3775	2	#N/A	#N/A	2	#N/A
Pseudogymnoascus sp. VKM F-3808	#N/A	#N/A	#N/A	3	#N/A
Pseudogymnoascus sp. VKM F-4246	2	#N/A	#N/A	1	#N/A
Pseudogymnoascus sp. VKM F-4281 (FW-2241)	3	#N/A	#N/A	3	#N/A
Pseudogymnoascus sp. VKM F-4513 (FW-928)	1	#N/A	#N/A	2	#N/A
Pseudogymnoascus sp. VKM F-4514 (FW-929)	#N/A	#N/A	#N/A	4	#N/A
Pseudogymnoascus sp. VKM F-4515 (FW-2607)	5	#N/A	#N/A	2	#N/A
Pseudogymnoascus sp. VKM F-4516 (FW-969)	1	#N/A	#N/A	#N/A	#N/A
Pseudogymnoascus sp. VKM F-4517 (FW-2822)	1	#N/A	#N/A	3	#N/A
Pseudogymnoascus sp. VKM F-4518 (FW-2643)	6	#N/A	#N/A	4	#N/A
Pseudogymnoascus sp. VKM F-4519 (FW-2642)	5	#N/A	#N/A	2	#N/A
Pseudogymnoascus sp. VKM F-4520 (FW-2644)	3	#N/A	#N/A	3	#N/A
Pseudogymnoascus sp. WSF 3629	1	#N/A	#N/A	4	1
Pseudogymnoascus verrucosus UAMH 10579	#N/A	#N/A	#N/A	1	#N/A
Pseudomassariella vexata CBS 129021	1	#N/A	#N/A	7	#N/A
Pseudomonas aeruginosa	#N/A	#N/A	#N/A	#N/A	1
Pseudomonas phage EL	#N/A	#N/A	#N/A	#N/A	1
Pseudovirgaria hyperparasitica CBS 121739	#N/A	#N/A	#N/A	5	#N/A
Purpureocillium lilacinum 36-1	2	#N/A	1	1	#N/A
Purpureocillium lilacinum PLBJ-1	2	#N/A	#N/A	2	#N/A
Purpureocillium lilacinum PLFJ-1	2	#N/A	#N/A	1	#N/A
Pyrenochaeta sp. DS3sAY3a	1	2	2	6	#N/A
Pyrenophora seminiperda CCB06	#N/A	#N/A	#N/A	2	#N/A
Pyrenophora tritici-repentis 134	#N/A	1	#N/A	#N/A	#N/A
Pyrenophora tritici-repentis 5213	#N/A	1	#N/A	#N/A	#N/A
Pyrenophora tritici-repentis Pt-1C-BFP	#N/A	#N/A	#N/A	3	#N/A
Pyrenophora tritici-repentis V0001	#N/A	#N/A	#N/A	2	#N/A
Pyricularia grisea NI907	3	#N/A	#N/A	9	#N/A
Pyricularia oryzae 70-15	4	2	#N/A	3	#N/A
Pyricularia oryzae BM1-24	#N/A	#N/A	#N/A	1	#N/A
Pyricularia oryzae MZ5-1-6	#N/A	1	#N/A	4	#N/A
Pyricularia oryzae P131	2	1	#N/A	4	#N/A
Pyricularia oryzae Y34	2	1	#N/A	3	#N/A
Pyricularia pennisetigena Br36	4	2	#N/A	2	#N/A
Pyricularia sp. CBS 133598 NI919	3	1	#N/A	2	#N/A
Ramularia collo-cygni URUG2	#N/A	#N/A	#N/A	1	#N/A
Raphidocelis subcapitata NIES-35	#N/A	#N/A	#N/A	#N/A	1
Rasamsonia emersonii CBS 393.64	#N/A	#N/A	#N/A	1	#N/A
Rhinocladiella mackenziei CBS 650.93	4	#N/A	#N/A	1	#N/A
Rhizobium	#N/A	#N/A	#N/A	#N/A	1
Rhizoctonia solani AG-1 IB isolate 7/3/14	#N/A	#N/A	3	#N/A	#N/A
Rhizoctonia solani AG-1 IB Rhizoctonia solani AG1-IB 7/3/14	#N/A	#N/A	1	#N/A	#N/A
Rhynchosporium agropyri 04CH-RAC-A.6.1	2	#N/A	#N/A	2	#N/A
Rhynchosporium commune UK7	#N/A	#N/A	#N/A	2	#N/A
Rhynchosporium secalis 02CH4-6a.1	#N/A	#N/A	#N/A	1	1
Rosellinia necatrix W97	#N/A	#N/A	1	2	#N/A
Rutstroemia sp. NJR-2017a BBW	1	#N/A	1	#N/A	#N/A
Rutstroemia sp. NJR-2017a BVV2	#N/A	#N/A	1	#N/A	#N/A
Rutstroemia sp. NJR-2017a WRK4	#N/A	#N/A	1	#N/A	#N/A
Scedosporium apiospermum IHEM 14462	#N/A	1	2	3	#N/A
Schizophyllum commune H4-8	#N/A	#N/A	1	#N/A	#N/A
Sclerotinia borealis F-4128	#N/A	1	1	3	#N/A
Sclerotinia sclerotiorum 1980 UF-70	#N/A	3	11	1	#N/A
Scytalidium lignicola DSM 105466	#N/A	#N/A	1	4	#N/A
Serendipita vermifera MAFF 305830	1	#N/A	#N/A	#N/A	#N/A
Setomelanomma holmii CBS 110217	#N/A	1	2	#N/A	#N/A
Sodiomyces alkalinus F11	1	1	1	8	#N/A
Sordaria macrospora R19027	#N/A	#N/A	1	#N/A	#N/A
Sparassis crispa	#N/A	#N/A	#N/A	1	#N/A
Sphaerulina musiva SO2202	#N/A	#N/A	#N/A	1	#N/A
Sporisorium scitamineum	#N/A	#N/A	#N/A	1	#N/A
Sporisorium scitamineum SscI8	#N/A	#N/A	#N/A	1	#N/A
Sporormia fimetaria CBS 119925	2	#N/A	#N/A	1	#N/A
Sporothrix brasiliensis 5110	#N/A	1	1	13	#N/A
Sporothrix insectorum RCEF 264	#N/A	2	#N/A	21	1
Sporothrix schenckii 1099-18	#N/A	1	1	2	#N/A
Sporothrix schenckii ATCC 58251	#N/A	#N/A	1	3	#N/A
Stachybotrys chartarum IBT 40288	#N/A	#N/A	#N/A	3	1
Stachybotrys chartarum IBT 40293	#N/A	#N/A	#N/A	#N/A	1
Stachybotrys chartarum IBT 7711	#N/A	#N/A	#N/A	5	1
Stachybotrys chlorohalonata IBT 40285	#N/A	#N/A	#N/A	1	#N/A
Stemphylium lycopersici CIDEFI 212	#N/A	#N/A	#N/A	1	#N/A
Stemphylium lycopersici CIDEFI 213	#N/A	#N/A	#N/A	1	#N/A
Stemphylium lycopersici CIDEFI 216	1	#N/A	#N/A	1	#N/A
Talaromyces atroroseus IBT 11181	#N/A	#N/A	#N/A	5	#N/A
Talaromyces cellulolyticus Y-94	1	#N/A	#N/A	#N/A	#N/A
Talaromyces islandicus WF-38-12	1	#N/A	2	3	#N/A
Talaromyces marneffei 11CN-03-130	1	#N/A	#N/A	2	#N/A
Talaromyces marneffei 11CN-20-091	#N/A	#N/A	#N/A	3	#N/A
Talaromyces marneffei ATCC 18224	#N/A	#N/A	#N/A	4	#N/A
Talaromyces marneffei PM1	3	1	3	14	#N/A
Talaromyces pinophilus AR155	1	#N/A	#N/A	3	#N/A
Talaromyces rugulosus W13939	5	#N/A	#N/A	8	#N/A
Talaromyces stipitatus ATCC 10500	3	#N/A	#N/A	9	1
Talaromyces verruculosus TS63-9	1	#N/A	2	10	#N/A
Teratosphaeria nubilosa CBS 116005	#N/A	#N/A	1	#N/A	#N/A
Thaumarchaeota archaeon WBC_4_1_1450	#N/A	#N/A	1	#N/A	#N/A
Thaumarchaeota archaeon WBC_9_1B_215	#N/A	#N/A	1	#N/A	#N/A
Thaumarchaeota archaeon WBC_A_1A_201	#N/A	#N/A	1	#N/A	#N/A
Thermothelomyces thermophilus ATCC 42464	#N/A	1	1	2	#N/A
Thermothielavioides terrestris	#N/A	1	1	#N/A	#N/A
Thermothielavioides terrestris NRRL 8126	#N/A	2	1	#N/A	#N/A
Thielaviopsis punctulata CR-DP1	#N/A	#N/A	#N/A	1	#N/A
Tolypocladium capitatum CBS 113982	#N/A	#N/A	3	5	#N/A
Tolypocladium ophioglossoides CBS 100239	1	1	1	18	#N/A
Tolypocladium paradoxum NRBC 100945	#N/A	5	6	3	#N/A
Torrubiella hemipterigena	1	1	#N/A	2	2
Tothia fuscella CBS 130266	1	1	#N/A	1	#N/A
Trematosphaeria pertusa CBS 122368	1	#N/A	#N/A	5	#N/A
Trichoderma arundinaceum IBT 40837	#N/A	#N/A	1	2	2
Trichoderma asperellum CBS 433.97	1	#N/A	2	3	#N/A
Trichoderma asperellum IC-1	#N/A	#N/A	2	2	#N/A
Trichoderma atroviride IMI 206040	#N/A	#N/A	2	3	#N/A
Trichoderma citrinoviride TUCIM 6016	#N/A	#N/A	1	2	#N/A
Trichoderma gamsii A5MH	#N/A	#N/A	2	3	#N/A
Trichoderma gamsii T6085	#N/A	#N/A	2	4	#N/A
Trichoderma guizhouense NJAU 4742	#N/A	#N/A	1	3	#N/A
Trichoderma harzianum CBS 226.95	#N/A	#N/A	#N/A	4	#N/A
Trichoderma harzianum T6776	1	#N/A	1	2	#N/A
Trichoderma harzianum Tr1	#N/A	#N/A	#N/A	2	#N/A
Trichoderma harzianum TR274	#N/A	#N/A	1	4	#N/A
Trichoderma lentiforme CFAM-422	#N/A	#N/A	1	2	#N/A
Trichoderma longibrachiatum ATCC 18648	#N/A	#N/A	1	2	#N/A
Trichoderma parareesei CBS 125925	#N/A	#N/A	1	2	#N/A
Trichoderma reesei QM6a	#N/A	#N/A	1	2	#N/A
Trichoderma reesei RUT C-30	#N/A	#N/A	#N/A	2	#N/A
Trichoderma virens Gv29-8	1	#N/A	1	3	#N/A
Tricholomella constricta CBS 661.87	#N/A	#N/A	1	#N/A	#N/A
Trichophyton benhamiae CBS 112371	#N/A	#N/A	#N/A	7	#N/A
Trichophyton equinum CBS 127.97	4	#N/A	#N/A	7	#N/A
Trichophyton interdigitale H6	1	#N/A	#N/A	8	#N/A
Trichophyton interdigitale MR816	2	#N/A	#N/A	5	#N/A
Trichophyton interdigitale UCMS-IGIB-CI12	#N/A	#N/A	#N/A	3	#N/A
Trichophyton interdigitale UCMS-IGIB-CI14	#N/A	#N/A	#N/A	1	#N/A
Trichophyton mentagrophytes TIMM 2789	1	#N/A	#N/A	7	#N/A
Trichophyton rubrum CBS 100081	1	#N/A	#N/A	#N/A	#N/A
Trichophyton rubrum CBS 118892	3	#N/A	#N/A	#N/A	#N/A
Trichophyton rubrum CBS 202.88	#N/A	#N/A	#N/A	1	#N/A
Trichophyton rubrum CBS 735.88	1	#N/A	#N/A	1	#N/A
Trichophyton rubrum CMCC(F)T1i	1	#N/A	#N/A	#N/A	#N/A
Trichophyton rubrum IGIB-SBL-CI1	1	#N/A	#N/A	#N/A	#N/A
Trichophyton rubrum MR850	2	#N/A	#N/A	6	#N/A
Trichophyton soudanense CBS 452.61	1	#N/A	#N/A	4	#N/A
Trichophyton tonsurans CBS 112818	2	#N/A	#N/A	10	#N/A
Trichophyton verrucosum HKI 0517	#N/A	#N/A	#N/A	7	#N/A
Trichophyton violaceum CMCC(F)T3l	#N/A	#N/A	#N/A	6	#N/A
Uncinocarpus reesii 1704	2	#N/A	#N/A	4	#N/A
unclassified Mesorhizobium	#N/A	#N/A	#N/A	#N/A	1
Ustilaginoidea virens IPU010	#N/A	#N/A	#N/A	5	#N/A
Ustilaginoidea virens UV-8b	#N/A	#N/A	#N/A	5	#N/A
Valsa mali 03-8	#N/A	#N/A	#N/A	3	#N/A
Valsa malicola 03-1	#N/A	#N/A	#N/A	1	#N/A
Valsa sordida YSFL	#N/A	#N/A	#N/A	#N/A	1
Venturia effusa albino	#N/A	1	#N/A	#N/A	#N/A
Venturia inaequalis 05/172	1	#N/A	#N/A	#N/A	#N/A
Venturia inaequalis 120213	2	#N/A	#N/A	#N/A	#N/A
Venturia inaequalis DMI_063113	1	#N/A	#N/A	#N/A	#N/A
Venturia nashicola MAFF615029	#N/A	1	#N/A	1	#N/A
Venturia nashicola PRI2	#N/A	1	#N/A	#N/A	#N/A
Venustampulla echinocandica BP 5553	2	#N/A	#N/A	1	#N/A
Verruconis gallopava CBS 43764	1	1	#N/A	2	#N/A
Verticillium alfalfae VaMs.102	#N/A	#N/A	#N/A	3	#N/A
Verticillium dahliae 12008	1	#N/A	#N/A	4	#N/A
Verticillium dahliae 12158	#N/A	#N/A	#N/A	4	#N/A
Verticillium dahliae 12161	#N/A	#N/A	#N/A	3	#N/A
Verticillium dahliae 12251	#N/A	#N/A	#N/A	3	#N/A
Verticillium dahliae Getta Getta	#N/A	#N/A	#N/A	3	#N/A
Verticillium dahliae Gwydir1A3	1	#N/A	#N/A	1	#N/A
Verticillium dahliae VDG1	1	#N/A	#N/A	4	#N/A
Verticillium dahliae VDG2	2	#N/A	#N/A	4	#N/A
Verticillium dahliae VdLs.17	2	#N/A	#N/A	5	#N/A
Verticillium longisporum VL1	1	#N/A	#N/A	7	#N/A
Verticillium longisporum VL2	2	#N/A	#N/A	5	#N/A
Verticillium nonalfalfae VnAa140/NRRL 66861	#N/A	#N/A	#N/A	1	#N/A
Volvox carteri f. nagariensis Eve	#N/A	#N/A	1	#N/A	#N/A
Vulcanisaeta distributa	#N/A	#N/A	1	#N/A	#N/A
Vulcanisaeta souniana JCM 11219	#N/A	#N/A	1	#N/A	#N/A
Vulcanisaeta sp. AZ3	#N/A	#N/A	2	#N/A	#N/A
Vulcanisaeta sp. CIS_19	#N/A	#N/A	1	#N/A	#N/A
Wuchereria bancrofti	#N/A	#N/A	#N/A	#N/A	1
Xylaria grammica IHI A82	#N/A	#N/A	1	3	1
Xylaria hypoxylon DSM 108379	1	#N/A	#N/A	3	2
Xylaria longipes IHI A66	#N/A	#N/A	#N/A	5	#N/A
Xylaria multiplex DSM 110363	#N/A	#N/A	#N/A	3	#N/A
Xylona heveae TC161	#N/A	#N/A	#N/A	2	#N/A
Zopfia rhizophila CBS 207.26	6	#N/A	#N/A	8	#N/A
Zymoseptoria brevis Zb18110	#N/A	#N/A	#N/A	1	#N/A
Zymoseptoria tritici IPO323	1	#N/A	#N/A	#N/A	#N/A
Zymoseptoria tritici ST99CH_1E4	1	#N/A	#N/A	1	1
