# Supplementary material for: The Enterprise , a massive transposon carrying Spok meiotic drive genes
Source: HighWire-hosted journal article supplement (doi:10.1101/gr.267609.120), 2021-04-19
Supplement: Supplemental_Table_S4_Fitness.xlsx [file Supplemental_Table_S4_Fitness.xlsx]

## Sheet: Sheet1
Supplementary Table S4 Data obtained in the fitness measurements.
nr1	group2	parent strains3		germination score (mm growth diameter in two angles after 48 hours)5																					yield (count in 5 ul diluted suspension)6
		female	male	sp/ascus4	1		2		3		4		5		6		7		8		9		10		1	2	3	4	5	dilution factor7	total yield8
10	1	S+	S-	4	21	21	21	22	23	24	23	24	22	21	23	22	24	24	24	22	24	22	22	23	45	49	60	49	60	50	789000
11	1	S+	S-	4	23	24	21	21	24	24	27	25	24	25	24	24	23	23	23	24	24	22	22	24	50	47	43	62	72	50	822000
12	1	S+	S-	4	22	23	22	21	22	22	22	22	24	22	22	24	21	23	24	23	22	23	23	24	50	55	40	61	65	50	813000
13	1	S+	S-	4	22	22	15	13	23	23	20	21	22	20	22	22	21	21	21	23	21	22	20	21	53	56	47	61	54	50	813000
14	1	S+	S-	4	23	21	23	24	21	20	24	24	21	22	23	23	24	24	23	22	23	23	24	23	70	64	67	78	44	50	969000
15	2	S+	S-	4	25	25	22	23	22	23	25	23	23	24	22	23	24	24	24	25	24	23	22	26	43	51	59	48	48	50	747000
16	2	S+	S-	4	25	25	N/A	N/A	22	24	24	23	24	24	24	23	25	24	26	24	24	23	24	23	52	43	53	54	52	50	762000
17	2	S+	S-	4	25	24	24	24	24	23	24	23	24	24	24	24	23	24	25	25	24	26	24	23	60	48	49	64	49	50	810000
18	2	S+	S-	4	23	23	23	22	23	24	23	24	24	24	23	22	22	23	23	22	22	23	24	24	45	41	53	51	56	50	738000
19	2	S+	S-	4	23	25	23	23	23	24	22	23	21	22	24	24	24	24	24	23	24	23	24	22	54	38	44	43	60	50	717000
20	1	S+	Psk1xS14-	4	24	24	23	23	23	23	23	23	N/A	N/A	23	24	22	23	23	22	N/A	N/A	23	23	50	33	41	32	42	50	594000
				2	22	23	23	23	22	22	24	23	24	22	22	23	23	24	23	23	24	24	23	23
21	1	S+	Psk1xS14-	4	25	25	23	23	23	24	24	24	24	25	16	16	24	23	23	23	21	23	23	24	40	46	56	50	41	50	699000
0				2	25	24	24	25	25	24	N/A	N/A	25	24	23	26	25	25	23	23	24	23	24	23
22	1	S+	Psk1xS14-	4	23	24	25	23	23	22	25	25	25	23	24	23	22	22	23	23	23	23	24	24	43	36	45	40	47	50	633000
				2	22	22	25	22	23	22	23	23	24	24	23	23	24	24	23	23	22	23	23	22
23	1	S+	Psk1xS14-	4	22	23	22	23	22	23	24	24	20	21	23	24	22	21	23	23	23	23	21	22	39	47	40	34	41	50	603000
				2	23	23	22	23	22	23	22	23	22	24	22	24	23	23	17	16	24	23	22	23
24	1	S+	Psk1xS14-	4	14	14	23	19	22	23	21	22	20	20	N/A	N/A	22	22	22	22	23	22	21	23	42	43	34	31	31	50	543000
				2	22	22	18	20	22	22	21	21	22	21	23	21	23	22	22	21	20	22	23	22
25	2	S+	Psk1xS14-	4	23	24	18	24	22	22	24	22	24	24	21	22	23	24	24	24	22	23	23	22	44	34	36	35	43	50	576000
				2	24	23	24	22	24	25	23	24	24	25	24	24	24	24	23	24	22	23	24	22
26	2	S+	Psk1xS14-	4	23	24	23	24	25	25	17	17	25	24	24	25	24	24	23	23	23	22	24	23	33	33	36	41	44	50	561000
				2	26	25	25	24	24	25	25	23	24	24	24	24	24	25	24	24	23	26	22	23
27	2	S+	Psk1xS14-	4	24	24	25	24	24	26	24	24	23	24	25	24	22	23	23	23	23	23	24	24	40	50	47	54	44	50	705000
				2	25	24	24	23	23	25	23	23	24	23	23	25	25	23	25	24	23	24	24	22
28	2	S+	Psk1xS14-	4	24	24	23	17	23	25	24	24	23	24	22	23	24	23	23	24	N/A	N/A	N/A	N/A	60	53	48	51	45	50	771000
				2	23	23	17	24	23	23	24	23	24	25	25	25	24	23	24	23	24	23	23	22
29	2	S+	Psk1xS14-	4	22	23	24	24	24	25	23	22	23	23	22	24	23	24	22	21	25	22	20	20	33	43	46	61	49	50	696000
				2	23	23	23	24	23	24	23	24	24	25	24	23	23	23	24	24	23	22	24	24
30	1	S+	psk7xS14-	4	24	24	23	24	24	24	24	23	24	23	25	25	25	24	24	25	23	25	22	24	37	47	48	46	35	50	639000
				2	24	23	22	23	23	23	25	23	23	23	21	22	23	22	24	23	23	23	24	23
31	1	S+	psk7xS14-	4	22	21	21	23	22	22	22	22	21	22	24	21	21	21	21	24	21	21	23	21	48	43	43	43	40	50	651000
				2	25	24	24	25	21	23	25	22	23	22	23	23	24	22	22	23	21	23	20	22
32	1	S+	psk7xS14-	4	21	22	21	22	22	22	22	21	22	21	22	23	23	23	23	21	23	22	23	24	50	52	51	39	49	50	723000
				2	23	22	22	23	22	22	22	22	23	22	23	24	22	22	22	23	23	24	23	23
33	1	S+	psk7xS14-	4	23	22	21	21	21	21	21	22	21	22	21	22	23	21	22	21	22	22	21	22	42	45	49	28	45	50	627000
				2	18	19	22	21	21	20	21	22	21	21	22	21	22	21	21	21	4	5	23	22
34	1	S+	psk7xS14-	4	22	23	N/A	N/A	22	21	21	21	21	21	20	21	21	21	25	23	22	23	23	23	46	41	37	46	39	50	627000
				2	22	22	21	23	18	19	24	24	22	23	23	22	23	22	24	23	22	23	23	23
35	2	S+	psk7xS14-	4	24	24	24	22	23	23	24	24	25	24	23	24	23	24	23	22	23	24	23	23	53	42	41	35	45	50	648000
				2	23	22	24	24	24	23	24	23	23	23	24	23	24	23	24	24	23	22	24	22
36	2	S+	psk7xS14-	4	24	24	23	26	24	24	24	24	25	24	0	0	13	13	25	24	23	22	23	24	29	40	35	31	45	50	540000
				2	24	24	23	23	23	23	24	23	25	24	24	25	25	23	25	23	24	21	24	21
37	2	S+	psk7xS14-	4	23	22	23	24	24	24	24	23	23	23	25	25	24	24	24	25	24	23	11	11	59	64	60	68	55	50	918000
				2	23	24	24	25	22	22	23	23	23	23	24	25	24	25	24	25	25	24	25	24
38	2	S+	psk7xS14-	4	24	24	22	22	23	23	23	22	24	24	24	23	24	24	23	24	26	24	23	23	42	38	47	49	49	50	675000
				2	23	23	23	23	23	23	23	23	24	23	22	23	23	22	24	23	23	23	23	23
39	2	S+	psk7xS14-	4	14	15	24	25	24	23	23	23	23	25	23	24	23	23	23	23	25	23	23	23	56	67	56	54	54	50	861000
				2	23	23	23	24	23	24	23	23	23	23	22	24	23	23	24	23	24	23	23	22
40	1	Psk1xS14+	S-	4	23	23	22	23	23	22	23	23	24	22	23	23	23	23	24	24	22	23	24	26	21	22	24	21	21	50	327000
				2	24	22	23	22	22	22	22	20	23	23	22	23	23	24	23	24	22	23	22	22
41	1	Psk1xS14+	S-	4	21	22	22	21	21	21	20	22	21	22	20	21	21	22	22	22	22	24	20	21	31	36	37	34	34	50	516000
				2	22	22	21	22	22	22	21	21	21	21	21	21	22	20	22	22	21	19	21	21
42	1	Psk1xS14+	S-	4	23	24	20	21	21	21	22	22	22	22	22	22	23	24	23	24	22	23	22	21	31	27	37	34	30	50	477000
				2	22	21	22	21	23	22	21	22	22	23	23	24	24	24	21	22	23	24	25	23
43	1	Psk1xS14+	S-	4	22	22	22	21	22	23	23	23	21	23	23	23	21	23	24	24	N/A	N/A	23	23	N/A	N/A	N/A	N/A	N/A	N/A	N/A
				2	23	22	22	21	22	22	22	23	24	23	23	22	22	22	20	19	22	20	21	24
44	1	Psk1xS14+	S-	4	22	21	20	22	21	20	21	22	22	21	22	22	23	21	22	22	22	22	21	22	21	36	21	33	33	50	432000
				2	21	21	21	22	20	20	23	21	22	21	21	21	22	21	21	23	21	22	21	22
45	2	Psk1xS14+	S-	4	23	23	25	24	24	24	24	24	24	23	23	24	24	23	26	23	24	24	20	18	26	20	20	27	25	50	354000
				2	23	24	24	23	23	23	24	24	23	25	22	23	23	24	25	25	23	25	25	24
46	2	Psk1xS14+	S-	4	25	25	23	25	24	24	24	24	25	25	24	23	25	24	25	23	24	23	24	22	30	29	27	27	29	50	426000
				2	24	24	24	24	24	24	24	25	24	25	24	23	23	23	24	24	23	24	24	22
47	2	Psk1xS14+	S-	4	24	24	25	23	24	23	24	23	23	23	24	25	24	23	25	26	23	23	25	23	22	44	34	34	26	50	480000
				2	25	23	25	24	23	24	23	22	23	25	22	23	23	21	25	25	23	24	24	24
48	2	Psk1xS14+	S-	4	23	23	23	23	23	24	24	24	22	22	23	23	22	21	23	22	22	22	24	23	39	38	46	41	37	50	603000
				2	23	24	23	24	22	24	24	24	24	23	21	22	23	23	24	24	24	22	24	23
49	2	Psk1xS14+	S-	4	24	23	22	23	23	22	23	22	23	24	23	23	17	17	24	23	23	23	23	23	21	32	29	25	36	50	429000
				2	23	23	21	22	23	22	23	22	24	23	23	24	23	24	23	23	23	22	24	23
50	1	Psk1xS14+	Psk1xS14-	4	24	23	23	23	23	22	23	22	23	21	24	23	24	22	24	24	24	24	22	23	20	27	30	27	32	50	408000
51	1	Psk1xS14+	Psk1xS14-	4	22	22	23	23	23	23	23	23	N/A	N/A	23	24	21	22	21	23	22	22	23	22	35	33	49	51	48	50	648000
52	1	Psk1xS14+	Psk1xS14-	4	22	23	22	22	23	22	22	23	25	23	22	24	22	23	23	22	24	24	23	21	30	30	41	28	31	50	480000
53	1	Psk1xS14+	Psk1xS14-	4	23	21	21	20	21	21	21	20	22	22	21	21	21	23	22	22	23	20	21	21	N/A	N/A	N/A	N/A	N/A	N/A	N/A
54	1	Psk1xS14+	Psk1xS14-	4	23	22	21	20	21	22	21	23	22	21	21	22	22	22	22	21	21	23	21	22	29	29	28	40	27	50	459000
55	2	Psk1xS14+	Psk1xS14-	4	25	24	24	25	25	25	24	25	25	26	25	25	24	25	25	25	23	25	25	24	46	32	31	48	31	50	564000
56	2	Psk1xS14+	Psk1xS14-	4	0	0	26	25	23	23	25	25	25	25	25	26	24	24	25	26	25	26	22	24	41	46	38	48	42	50	645000
57	2	Psk1xS14+	Psk1xS14-	4	25	24	23	24	25	23	23	23	24	23	25	23	25	23	25	24	24	23	24	22	47	70	40	46	53	50	768000
58	2	Psk1xS14+	Psk1xS14-	4	24	24	24	24	23	23	24	23	23	23	23	22	22	22	23	22	23	22	23	22	29	45	33	39	38	50	552000
59	2	Psk1xS14+	Psk1xS14-	4	23	23	23	23	26	25	24	24	24	23	24	23	24	24	23	24	25	23	N/A	N/A	42	43	55	59	48	50	741000
60	1	psk7xS14+	S-	4	24	24	23	24	24	24	23	21	24	24	23	24	24	24	24	25	23	24	23	22	28	43	42	32	39	50	552000
				2	22	21	23	23	22	22	22	23	23	22	23	22	23	23	23	23	23	23	24	22
61	1	psk7xS14+	S-	4	22	22	23	23	24	23	23	22	23	23	24	24	21	22	24	23	20	21	22	22	33	40	34	42	44	50	579000
				2	24	23	23	22	23	23	23	23	22	22	23	22	20	20	23	23	17	17	22	22
62	1	psk7xS14+	S-	4	23	23	23	23	23	24	23	24	23	24	24	22	24	24	24	23	24	25	24	23	N/A	N/A	N/A	N/A	N/A	N/A	N/A
				2	24	23	21	22	21	21	22	23	22	24	23	22	23	22	23	22	21	21	20	22
63	1	psk7xS14+	S-	4	22	22	21	21	22	22	21	22	21	20	21	22	21	21	19	20	22	23	21	21	54	42	55	60	55	50	798000
				2	19	20	21	21	22	22	21	22	20	20	22	22	21	20	21	21	20	20	21	21
64	1	psk7xS14+	S-	4	22	24	N/A	N/A	23	23	21	23	16	17	22	23	21	21	23	23	22	24	23	23	39	38	52	45	41	50	645000
				2	21	21	21	23	22	21	22	21	18	16	23	23	19	15	23	22	22	22	23	22
65	2	psk7xS14+	S-	4	23	24	24	24	24	24	23	22	23	24	23	25	23	23	23	22	24	24	24	24	35	39	34	43	36	50	561000
				2	24	23	23	23	23	23	23	24	23	24	23	24	23	24	23	25	25	22	20	22
66	2	psk7xS14+	S-	4	25	25	23	25	23	24	23	24	22	24	22	25	23	24	24	24	23	24	24	22	55	50	39	63	49	50	768000
				2	24	23	25	23	24	24	24	24	25	25	23	24	23	24	23	23	23	25	23	24
67	2	psk7xS14+	S-	4	23	23	20	20	23	24	23	23	24	24	23	22	23	24	23	23	23	25	23	25	35	44	41	33	52	50	615000
				2	23	23	23	24	23	24	24	25	24	24	23	24	23	23	24	23	24	24	25	24
68	2	psk7xS14+	S-	4	22	22	21	22	22	22	23	23	23	21	22	22	25	24	15	16	23	23	23	21	42	45	55	39	40	50	663000
				2	23	23	17	15	24	24	23	26	21	19	0	0	22	23	22	23	24	23	23	22
69	2	psk7xS14+	S-	4	24	24	23	23	21	23	23	23	22	22	22	23	24	22	23	24	N/A	N/A	23	21	30	44	35	41	34	50	552000
				2	24	24	23	23	22	22	N/A	N/A	23	23	22	23	24	23	21	22	24	23	17	17
70	1	psk7xS14+	psk7xS14-	4	23	23	22	23	23	22	23	22	23	23	25	25	25	25	24	23	24	23	23	21	33	44	33	36	38	50	552000
71	1	psk7xS14+	psk7xS14-	4	22	22	22	22	21	20	22	23	0	0	23	24	22	23	18	18	20	21	22	21	46	49	44	50	55	50	732000
72	1	psk7xS14+	psk7xS14-	4	24	23	23	23	23	24	22	22	24	24	24	23	23	25	24	24	22	20	24	23	N/A	N/A	N/A	N/A	N/A	N/A	N/A
73	1	psk7xS14+	psk7xS14-	4	20	22	23	23	21	22	21	21	21	21	22	23	21	20	23	22	20	20	22	23	45	58	56	49	55	50	789000
74	1	psk7xS14+	psk7xS14-	4	21	20	22	22	22	20	22	22	22	23	N/A	N/A	22	22	21	23	21	22	24	24	57	43	51	59	41	50	753000
75	2	psk7xS14+	psk7xS14-	4	22	24	22	23	22	24	25	24	23	24	24	25	24	25	24	23	23	24	25	22	46	48	64	56	65	50	837000
76	2	psk7xS14+	psk7xS14-	4	24	22	24	23	22	21	24	25	23	22	23	24	24	24	24	25	23	25	22	25	49	43	51	52	61	50	768000
77	2	psk7xS14+	psk7xS14-	4	22	23	23	23	22	23	24	25	22	23	25	25	24	24	25	24	23	24	23	23	41	39	43	53	55	50	693000
78	2	psk7xS14+	psk7xS14-	4	25	23	21	23	24	21	23	22	22	23	23	24	23	22	21	22	23	21	23	21	49	47	43	55	46	50	720000
79	2	psk7xS14+	psk7xS14-	4	0	0	23	22	23	23	23	23	23	23	23	24	24	24	23	22	24	23	24	22	49	48	35	34	41	50	621000
1Cross number given in the experiment
2The experiment was divided into two groups, group 2 was started 1 day after group 1.
3The + and – behind the strain name indicate the mating type.
4Scores came from a spore isolated from either a 2- or a 4-spore ascus.
5Columns “1” to “10” are for ten different spores of each ascus type of each cross that were placed on the test medium. The numbers indicate the diameter in two directions measured in mm, 48 hours after placing on the medium. “N/A” indicates missing data because the spore transfer failed. A red zero indicates a spore that did not germinate.
6Columns “1” to “5” are the technical replicates for which the spores in 5 µl were counted. For crosses with spore killing, the total yield data are on the line of 4-spored asci but include spores from both types of asci (at this point it is not possible to distinguish between spores from 2-spored asci and 4-spored asci)
7The dilution factor that was used for the suspension before counting
8Total yield was calculated by averaging the technical replicate counts, multiplied by the dilution factor, divided by the 0.005 ml and multiplied by 1.5 ml. For some crosses the yield was not measured, because the plates were infected at the time of harvest (indicated with N/A).
